# Supplementary material for: Alcohol Use Disorder Causes Profound Global Changes in Gene Expression and Splicing in the Liver
Source: Research Square preprint supplement (doi:10.21203/rs.3.rs-6507570/v1), 2025-05-08
Supplement: Supplementary file 2 [file 05d873d65f558e6546826cec.xlsx]

## Sheet: Sheet1
Supplementary Table 1
Primers for human and rat snRNAs
	snRNA	Forward	Reverse	Probe
	Human
	U1	TGTTATGATCACGAAGGTGGTT	CCCACTGCCACAAGTTATGTA	TTTGCTGTGGATGTGCTGACCC
	U2	TTTGGCTAAGATCAAGTGTAGT	AAGCATCCCGTACGATCT	AATGTTTCCACTACCTACCGCACA
	U4	AGCTTTGTACAGTGACAGGATTA	AATGCCAGGGTATTGGGAAA	AGCCAATGAGGCATGATTATTGCT
	U6	CTTGCTTCAGTAGCACATA	CAAATTTGTGTGTCATCCTT	TTGAAATTGGAATGATACAGCTGCT
	U6atac	AGGAGAGAAGGTTAGCATTTCC	CGGACATCTTTACATGTGCTTATT	CTTGACAATGACGGAAGAGGCCCT
	U11	AAAGGGCTTCTGTCGTGAG	ATCACCAGCTGCCCAAATA	TCTCTTGATGTCGATTCCGCACGC
	U12	CCGAATCCTCACTGCTAATGT	CAGGCATCCCGCAAAGTA	TCACCTTGAGGGCGACCTTTACC
	Rat
	U1	GGCAGGGAGATACCATGTTTAC	CCCATTTGAGGTGTCAGTACAT	TCCCAGGGCAAGGTTTATCCTTCG
	U2	TGGCTAAGATCAAGTGTAGTATCTG	AGCAAGCTCCTATTCCAACTC	TCTGATACGTCCTCTATCCGAGGACA
	U4	CTGTGCAGTGGCAGTATCA	ACCTATGACCATCTGGCTTTC	AGCCAATGAGGTTTATCTGAGGCATGA
	U6	CTTCAGCAGTATGTACACTAA	TCATTCTTGCCCAGGAG	AGAATCATATGGAGGAGATTGGAATGG
	U6atac	AGGCAACTGACTGTTCCTTAG	TAAATGGCAATGCCTTAATCACC	AGGCTCTTGGGCCTTACAATAAATT
	U11	AGGGCTTCTGTCGTGAGT	TGCTTCCGAAATCTCTTGATGT	CTCGATTGCTCTGCGTGCGGAATC
	U12	TGCTCTAAACTTATGAGTAAGGAAG	GGTCAGCTTTACCCACCTAAA	TACCAGTTATGAGGACTCAGGGTTCATCC
