# Supplementary material for: Alcohol Use Disorder Causes Profound Global Changes in Gene Expression and Splicing in the Liver
Source: Research Square preprint supplement (doi:10.21203/rs.3.rs-6507570/v1), 2025-05-08
Supplement: Supplementary file 3 [file 15b8a1d41f9386d6f2585799.xlsx]

## Sheet: Sheet1
	Supplementary Table 5
	List of Splicing Factors
		ACIN1
		AQR
		BCAS2
		BUD31
		CCDC12
		CDC40
		CDC5L
		CHERP
		CRNKL1
		CTNNBL1
		CWC15
		DDX23
		DDX39B
		DDX42
		DDX46
		DDX5
		DHX15
		DHX16
		DHX38
		DHX8
		EFTUD2
		EIF4A3
		HNRNPA1
		HNRNPA1L2
		HNRNPA3
		HNRNPC
		HNRNPK
		HNRNPM
		HNRNPU
		HSPA1A
		HSPA1B
		HSPA1L
		HSPA2
		HSPA6
		HSPA8
		ISY1
		LOC120364
		LOC653884
		LSM2
		LSM3
		LSM4
		LSM5
		LSM6
		LSM7
		MAGOH
		MAGOHB
		NAA38
		NCBP1
		NCBP2
		NHP2L1
		PCBP1
		PHF5A
		PLRG1
		PPIE
		PPIH
		PPIL1
		PQBP1
		PRPF18
		PRPF19
		PRPF3
		PRPF31
		PRPF38A
		PRPF38B
		PRPF4
		PRPF40A
		PRPF40B
		PRPF6
		PRPF8
		PUF60
		RBM17
		RBM22
		RBM25
		RBM8A
		RBMX
		SART1
		SF3A1
		SF3A2
		SF3A3
		SF3B1
		SF3B14
		SF3B2
		SF3B3
		SF3B4
		SF3B5
		SLU7
		SMNDC1
		SNRNP200
		SNRNP27
		SNRNP40
		SNRNP70
		SNRPA
		SNRPA1
		SNRPB
		SNRPB2
		SNRPC
		SNRPD1
		SNRPD2
		SNRPD3
		SNRPE
		SNRPF
		SNRPG
		SNW1
		SRSF1
		SRSF10
		SRSF2
		SRSF3
		SRSF4
		SRSF5
		SRSF6
		SRSF7
		SRSF8
		SRSF9
		SYF2
		TCERG1
		THOC1
		THOC2
		THOC3
		THOC4
		TRA2A
		TRA2B
		TXNL4A
		U2AF1
		U2AF2
		U2SURP
		USP39
		WBP11
		XAB2
