# Supplementary material for: Alcohol Use Disorder Causes Profound Global Changes in Gene Expression and Splicing in the Liver
Source: Research Square preprint supplement (doi:10.21203/rs.3.rs-6507570/v1), 2025-05-08
Supplement: Supplementary file 4 [file 24d0121ee45b189a5b2c09b0.xlsx]

## Sheet: Sheet1
Table 2
Biological Process	Number of lncRNAs
mRNA splicing, via spliceosome	23
DNA repair	21
RNA processing	19
mRNA processing	18
DNA metabolic process	17
