# Supplementary material for: Alcohol Use Disorder Causes Profound Global Changes in Gene Expression and Splicing in the Liver
Source: Research Square preprint supplement (doi:10.21203/rs.3.rs-6507570/v1), 2025-05-08
Supplement: Supplementary file 5 [file 25b03f52e0e0ef1841d5aa70.xlsx]

## Sheet: Sheet1
Supplementary Table 7
26 genes from GSEA “Spermatogenesis” pathway affected in the liver of patients with various stages of alcohol-induced liver damage
	Transcript	eASH	nsAH	sAH	exAH
	ACE		x	x	x
	ACRBP
	ACRV1
	ACTL7B
	ADAD1
	ADAM2				x
	ADCYAP1			x	x
	AGFG1	x	x	x	x
	AKAP4
	ALOX15
	ARL4A		x		x
	ART3	x	x	x
	AURKA
	BRAF	x	x	x	x
	BUB1	x	x	x	x
	CAMK4	x	x	x	x
	CCNA1
	CCNB2		x	x
	CCT6B		x	x	x
	CDK1	x	x	x	x
	CDKN3		x
	CFTR		x	x	x
	CHFR		x	x	x
	CHRM4				x
	CLGN
	CLPB			x	x
		6	13	13	14
