# Supplementary material for: Alcohol Use Disorder Causes Profound Global Changes in Gene Expression and Splicing in the Liver
Source: Research Square preprint supplement (doi:10.21203/rs.3.rs-6507570/v1), 2025-05-08
Supplement: Supplementary file 6 [file 4891a679b4b287050d64a9d6.xlsx]

## Sheet: Sheet1
Supplementary Table 6
26 genes from different chromosomes affected in the liver of patients with various stages of alcohol-induced liver damage
	Transcript	eASH	nsAH	sAH	exAH
	CMPK			x
	TIA1		x	x	x
	SERP1
	FAM114A1		x		x
	ERCC8
	EQTN				x
	FBXO24
	GDAP1		x		x
	NANS
	EGR2			x	x
	CAPRIN1				x
	INSL6
	SARDH	x	x	x	x
	CIDEB	x	x	x	x
	GATM		x	x	x
	DCTPP1
	FAM20A	x	x	x	x
	SPIN1	x
	CCDC8	x			x
	DBNDD2			x	x
	KCNE2
	MCM5		x
	DACH2			x
	MAGEA2
	NKRF
	PBDC1
		5	8	9	12
