# Supplementary material for: Alcohol Use Disorder Causes Profound Global Changes in Gene Expression and Splicing in the Liver
Source: Research Square preprint supplement (doi:10.21203/rs.3.rs-6507570/v1), 2025-05-08
Supplement: Supplementary file 8 [file 89419c0679edb22a8f237b5e.xlsx]

## Sheet: Sheet1
Supplementary Table 4
Transcripts consistently up- or downregulated in eASH, nsAH, sAH, and exAH
		Upregulated							Downregulated
		Ensembl Symbol	eASH	nsAH	sAH	exAH			Ensembl Symbol	eASH	nsAH	sAH	exAH
		ENSG00000054793.9	2.4278	4.9242	4.0251	4.4186			ENSG00000078487.13	-3.8961	-5.8317	-12.3383	-9.6691
		ENSG00000079432.3	2.73	2.6837	3.6128	6.1181			ENSG00000079156.12	-2.5557	-8.5156	-10.1252	-15.8311
		ENSG00000096746.13	2.529	8.655	5.0734	3.6762			ENSG00000095059.11	-2.4335	-2.9505	-10.0083	-2.9228
		ENSG00000099219.9	2.3275	2.4198	7.0818	3.1681			ENSG00000095203.10	-4.4473	-9.8301	-15.5537	-12.4911
		ENSG00000099284.9	3.3968	4.729	7.5978	5.6988			ENSG00000095564.9	-2.9019	-3.3692	-4.6854	-4.9235
		ENSG00000100031.14	3.3184	4.2143	5.0851	3.4175			ENSG00000095637.16	-4.1255	-5.6816	-3.2878	-5.4618
		ENSG00000100243.16	2.258	3.2893	6.01	5.6629			ENSG00000095951.12	-6.5204	-2.7307	-4.0618	-3.4616
		ENSG00000101557.10	3.6869	6.5695	8.0111	5.4435			ENSG00000096080.7	-2.8306	-7.0488	-11.0982	-7.8492
		ENSG00000102524.7	2.8848	3.2907	4.0506	7.503			ENSG00000099797.7	-4.0634	-4.9414	-10.219	-8.8616
		ENSG00000102996.4	3.576	6.4031	4.9023	10.6302			ENSG00000099840.9	-10.0468	-6.6698	-15.1379	-3.8517
		ENSG00000103249.13	2.0145	3.3754	4.6357	5.045			ENSG00000099968.13	-4.9076	-7.3081	-14.2267	-5.5813
		ENSG00000105971.10	2.4542	4.4008	6.7747	9.1697			ENSG00000099974.7	-3.0763	-5.7155	-11.6375	-9.533
		ENSG00000106086.14	3.4897	5.8246	5.8536	7.2625			ENSG00000100104.8	-2.3186	-3.8178	-12.4229	-10.409
		ENSG00000106144.15	2.468	4.1568	4.2513	7.3857			ENSG00000102547.14	-5.5405	-4.3937	-5.3066	-3.0964
		ENSG00000107338.8	3.1588	3.1194	5.6114	4.5741			ENSG00000102978.8	-7.7607	-10.8202	-10.6113	-18.0488
		ENSG00000108641.10	2.4922	5.1487	3.5612	3.4257			ENSG00000103037.7	-4.8889	-4.6712	-5.5824	-3.8975
		ENSG00000110395.4	2.9194	4.9617	6.3637	9.6969			ENSG00000103121.4	-8.5521	-12.2706	-12.7643	-20.1648
		ENSG00000110400.6	2.4332	5.8409	9.5662	4.5569			ENSG00000105894.7	-7.3602	-5.0678	-13.0121	-7.1447
		ENSG00000110756.13	6.3115	2.9615	6.8638	6.196			ENSG00000105976.10	-2.1695	-18.3085	-16.0223	-26.6996
		ENSG00000111057.6	2.4098	3.9152	6.2221	3.7834			ENSG00000106034.13	-4.4889	-12.1266	-20.3482	-15.4132
		ENSG00000111199.6	2.1404	5.4911	5.8549	2.2805			ENSG00000106069.16	-9.2843	-7.574	-20.9012	-9.8991
		ENSG00000111670.10	2.014	2.8966	4.9721	3.3521			ENSG00000107282.5	-2.6473	-14.4759	-13.4824	-7.1722
		ENSG00000112033.9	2.7395	4.0603	6.9267	4.4878			ENSG00000107518.12	-3.8443	-9.3852	-17.5126	-15.6704
		ENSG00000112242.10	2.4169	5.1402	18.8267	7.6004			ENSG00000108381.6	-6.8598	-7.4917	-9.4573	-10.9663
		ENSG00000112249.9	4.1266	3.3158	6.969	8.832			ENSG00000108387.10	-4.8164	-6.0178	-12.6835	-3.6992
		ENSG00000112312.5	2.7754	4.1298	4.0605	4.6448			ENSG00000108479.7	-2.4809	-3.4259	-12.058	-17.2584
		ENSG00000112343.8	4.8101	3.5442	5.316	3.4358			ENSG00000108604.11	-3.9652	-9.2349	-10.7202	-8.7138
		ENSG00000112531.12	3.3672	5.4332	3.4669	4.2984			ENSG00000110218.4	-4.3868	-4.9695	-6.5221	-3.6031
		ENSG00000115977.14	2.645	4.3663	6.6054	4.2954			ENSG00000110713.11	-6.0804	-8.6181	-8.8275	-12.8514
		ENSG00000116095.6	3.6917	3.6532	3.832	3.3566			ENSG00000110768.7	-2.7163	-4.7225	-3.1077	-5.8823
		ENSG00000116406.14	2.3932	2.6556	3.7082	2.3204			ENSG00000111254.3	-3.3814	-4.7522	-11.5379	-3.9444
		ENSG00000116473.10	3.4794	5.5807	5.7343	5.9515			ENSG00000111266.4	-3.7604	-5.2064	-5.0654	-4.5884
		ENSG00000116698.16	2.9042	9.5067	9.8757	3.8093			ENSG00000111339.6	-3.8374	-7.1615	-12.1066	-9.417
		ENSG00000116747.8	2.744	2.9436	4.2245	2.3881			ENSG00000111361.8	-2.4655	-4.6739	-5.078	-9.8982
		ENSG00000116954.7	2.6844	2.2747	5.1499	4.6815			ENSG00000111652.5	-2.1047	-3.2152	-2.1506	-4.5024
		ENSG00000117505.8	2.2072	3.6135	4.8981	4.0422			ENSG00000111696.7	-2.7377	-5.2228	-7.2998	-7.7638
		ENSG00000117713.13	3.3333	5.6576	4.8414	6.9062			ENSG00000112304.6	-3.0511	-7.8913	-29.6455	-10.6729
		ENSG00000118496.4	2.183	5.1254	4.022	6.7573			ENSG00000112394.12	-2.2504	-19.3852	-19.9148	-6.0393
		ENSG00000118946.7	2.5468	2.139	4.8318	5.6574			ENSG00000116221.11	-2.9342	-5.3523	-7.8214	-5.6425
		ENSG00000119042.12	5.1047	6.1274	6.616	7.5301			ENSG00000116539.6	-2.9607	-4.0542	-6.5728	-3.3369
		ENSG00000119314.11	2.2529	5.239	5.0385	4.4674			ENSG00000116667.8	-5.208	-8.0872	-13.0937	-8.7543
		ENSG00000119772.12	2.1211	5.45	4.2261	4.0481			ENSG00000116833.9	-3.7482	-7.3477	-12.6689	-11.1223
		ENSG00000119812.14	3.5137	4.1579	5.4429	3.1095			ENSG00000117155.12	-3.0035	-4.9681	-7.0067	-4.9757
		ENSG00000119953.8	3.0785	5.2277	6.618	9.4509			ENSG00000117281.11	-2.7684	-3.8395	-2.1576	-2.5107
		ENSG00000119969.10	4.2507	2.2239	2.8111	3.5394			ENSG00000117360.8	-5.754	-2.5813	-5.4679	-3.5071
		ENSG00000120280.5	2.6528	2.2562	3.441	3.0896			ENSG00000117479.8	-13.2023	-9.2633	-31.3433	-7.6782
		ENSG00000120370.8	2.7745	6.5669	6.1009	8.6369			ENSG00000117640.13	-4.1434	-3.2024	-14.4105	-23.7599
		ENSG00000120685.15	9.4764	12.0685	8.3922	5.9298			ENSG00000117643.10	-5.7406	-3.4801	-10.373	-4.3103
		ENSG00000120868.9	2.6035	3.5002	4.6598	3.7475			ENSG00000117791.11	-2.1467	-3.7209	-17.9304	-14.811
		ENSG00000121774.13	7.5122	6.7382	11.3977	7.222			ENSG00000117859.14	-5.0071	-9.7847	-11.1307	-11.1671
		ENSG00000122435.5	3.4672	6.8109	3.7417	5.4691			ENSG00000118096.3	-3.366	-8.0785	-17.6437	-12.8675
		ENSG00000122547.6	2.0218	5.008	8.3031	10.1366			ENSG00000118217.5	-3.7719	-15.836	-14.013	-6.004
		ENSG00000122958.10	2.3876	5.178	6.6321	4.462			ENSG00000118292.4	-3.8471	-7.273	-6.4728	-3.4223
		ENSG00000123575.8	2.4071	6.8285	8.2058	4.1477			ENSG00000119004.10	-2.4774	-3.9936	-6.9567	-6.6497
		ENSG00000123643.8	2.5923	5.209	8.5176	5.3956			ENSG00000119139.12	-4.3576	-7.5366	-14.397	-12.1036
		ENSG00000124222.17	2.9201	8.8305	7.065	3.2853			ENSG00000119203.9	-2.0455	-2.897	-3.949	-5.2411
		ENSG00000124602.5	2.3644	8.5821	4.5719	5.8105			ENSG00000119509.8	-2.3774	-7.5928	-8.4276	-15.9794
		ENSG00000124743.5	4.2384	3.0845	3.5169	2.1156			ENSG00000119760.11	-4.5897	-3.3299	-3.1371	-4.5157
		ENSG00000124762.9	4.055	7.2509	6.9259	5.0627			ENSG00000119929.8	-2.1399	-8.4361	-15.8726	-12.9387
		ENSG00000124802.7	4.0762	5.4899	6.8813	4.9713			ENSG00000119950.16	-5.6986	-11.4978	-18.5661	-5.6685
		ENSG00000125398.5	3.4407	3.6894	5.7665	9.4661			ENSG00000120156.16	-3.4452	-9.457	-8.1092	-8.6181
		ENSG00000125534.5	2.3637	8.6194	8.3916	8.4999			ENSG00000120158.7	-9.4789	-12.3215	-18.8228	-13.2998
		ENSG00000125755.14	2.2472	2.8151	3.4373	3.506			ENSG00000120217.9	-3.2891	-3.9876	-3.8821	-2.1223
		ENSG00000125775.10	2.4007	2.2213	3.3095	2.7005			ENSG00000120332.11	-7.5248	-5.4572	-9.5122	-7.0129
		ENSG00000126243.4	1.9757	5.0443	4.1594	5.0322			ENSG00000120729.5	-6.6761	-7.5734	-8.2487	-2.1613
		ENSG00000127129.5	3.7099	3.3288	3.544	2.4652			ENSG00000120833.9	-8.8033	-7.2529	-7.7811	-3.552
		ENSG00000127947.11	2.2968	3.6286	7.6667	12.6158			ENSG00000121067.13	-2.3637	-4.6572	-8.8361	-9.3595
		ENSG00000128833.8	2.0589	2.5494	5.2577	3.7835			ENSG00000121210.11	-2.7347	-5.8406	-9.335	-24.0626
		ENSG00000128989.6	2.0467	2.9534	5.1745	2.8986			ENSG00000121361.3	-3.7564	-8.4035	-20.6212	-31.2108
		ENSG00000129317.10	3.0013	6.513	4.0871	3.4341			ENSG00000121570.8	-2.6491	-9.9248	-11.3499	-2.0226
		ENSG00000129474.11	5.4576	10.2378	9.2786	4.2235			ENSG00000121671.7	-8.5748	-15.2152	-23.342	-16.8433
		ENSG00000129493.10	2.4547	3.8667	5.4079	2.861			ENSG00000121864.5	-2.3178	-5.4708	-8.0555	-2.2663
		ENSG00000129988.5	4.4546	3.9282	6.5981	2.5116			ENSG00000121871.3	-2.0639	-6.0333	-14.2334	-10.4706
		ENSG00000130338.8	2.0495	6.9858	9.7339	4.4307			ENSG00000122085.12	-3.8426	-4.4451	-10.1474	-10.7598
		ENSG00000130427.2	2.4066	2.7589	3.4526	2.7721			ENSG00000122203.10	-11.3247	-18.0091	-18.5215	-8.9551
		ENSG00000130522.4	2.8731	2.8711	6.0144	9.016			ENSG00000122756.10	-2.7448	-16.2462	-16.8829	-10.8878
		ENSG00000130589.12	3.0401	3.9067	3.1525	4.2649			ENSG00000122824.6	-5.8779	-3.5923	-8.0657	-4.3267
		ENSG00000130762.10	3.8335	4.6709	7.0871	2.9352			ENSG00000123144.6	-5.1542	-6.5106	-7.1087	-3.3272
		ENSG00000131149.13	3.0694	4.9001	5.854	5.0518			ENSG00000123349.9	-2.1263	-12.8201	-12.9508	-4.4408
		ENSG00000131467.6	4.9924	4.3632	11.7562	4.058			ENSG00000123560.9	-5.0158	-10.1365	-9.1641	-5.3912
		ENSG00000131473.12	2.7724	4.8261	8.6219	8.4287			ENSG00000123572.12	-11.1378	-6.9506	-8.2228	-4.8005
		ENSG00000132005.4	2.3548	3.0761	3.7708	4.2741			ENSG00000124003.9	-2.7427	-5.5876	-11.1762	-18.4533
		ENSG00000132481.2	3.727	3.8442	7.4911	7.4354			ENSG00000124019.9	-2.5133	-4.8107	-3.4198	-3.3677
		ENSG00000132485.8	2.4834	8.5257	5.2002	6.4867			ENSG00000124177.10	-5.1877	-3.5251	-5.1341	-4.4595
		ENSG00000132693.8	9.0537	8.0711	35.5774	23.902			ENSG00000124226.7	-4.7644	-5.7795	-7.1092	-7.6821
		ENSG00000132819.12	2.1238	5.0144	7.4736	8.007			ENSG00000124370.6	-2.3455	-6.4622	-18.1343	-12.9991
		ENSG00000132967.9	2.3464	5.4456	4.4406	2.4413			ENSG00000124374.8	-2.4173	-6.4447	-24.9563	-9.546
		ENSG00000133056.9	1.9344	6.4819	7.9448	2.3741			ENSG00000124383.4	-4.0587	-7.7847	-14.6098	-11.3712
		ENSG00000133111.3	2.1209	5.6986	5.7231	4.1556			ENSG00000124523.10	-4.7855	-4.8368	-20.2424	-34.012
		ENSG00000133226.12	4.6439	9.9558	9.316	6.9682			ENSG00000124562.5	-2.9429	-3.4117	-7.9609	-7.1406
		ENSG00000133398.3	5.5783	4.7121	9.1804	5.1511			ENSG00000124659.5	-2.2501	-3.1258	-2.4806	-4.6051
		ENSG00000133740.6	2.0276	2.6467	3.9351	2.9848			ENSG00000124702.13	-6.6256	-10.256	-13.0554	-4.9799
		ENSG00000133858.11	5.0069	4.9827	7.7565	7.8211			ENSG00000124713.5	-14.532	-19.4526	-29.7513	-21.2601
		ENSG00000134086.7	3.8371	4.1505	4.6928	4.9224			ENSG00000124780.9	-4.8795	-3.922	-15.8235	-4.5451
		ENSG00000134247.9	3.7729	3.9624	7.6234	8.7075			ENSG00000125149.7	-2.2417	-2.5206	-4.669	-6.7656
		ENSG00000134371.9	3.1068	3.8137	4.1445	5.1781			ENSG00000125812.11	-2.4094	-6.4391	-4.3835	-3.739
		ENSG00000134769.17	2.5088	7.9216	6.0799	10.6635			ENSG00000125971.12	-4.0902	-2.9679	-3.7322	-2.8188
		ENSG00000134851.8	2.386	2.9634	7.2926	9.9606			ENSG00000125991.14	-2.8938	-5.3988	-7.0298	-4.2855
		ENSG00000135052.12	2.0906	2.4706	7.6658	5.5776			ENSG00000126522.12	-3.282	-6.4858	-3.603	-7.2626
		ENSG00000135334.8	2.38	5.9845	7.0074	7.5995			ENSG00000126759.8	-6.1037	-5.2435	-6.0723	-28.757
		ENSG00000135766.8	2.1233	3.5498	3.9052	3.5802			ENSG00000126767.13	-2.2183	-5.0909	-8.2367	-5.091
		ENSG00000135912.6	2.4878	4.0635	4.5166	2.2846			ENSG00000127329.10	-9.1167	-14.7946	-10.9604	-14.5469
		ENSG00000136026.9	3.9499	3.7362	7.7793	4.0232			ENSG00000127540.7	-2.1445	-9.8631	-9.6539	-8.1376
		ENSG00000136144.7	2.6925	2.8926	7.4223	7.7056			ENSG00000127831.6	-11.729	-10.3916	-15.2522	-12.3225
		ENSG00000136238.13	3.1125	4.9027	8.0857	2.7711			ENSG00000127990.11	-4.4381	-5.113	-8.271	-4.1978
		ENSG00000136295.10	2.9456	4.5033	7.3973	11.0203			ENSG00000128185.5	-5.185	-6.8354	-18.6451	-20.9048
		ENSG00000136379.7	2.1525	5.9079	5.9781	9.4902			ENSG00000128606.8	-5.2668	-5.5691	-9.4522	-3.6057
		ENSG00000136603.9	2.9167	3.4205	4.1035	4.8065			ENSG00000128802.3	-3.8523	-4.8792	-11.3627	-13.5182
		ENSG00000136682.10	2.3425	5.064	3.5697	2.3388			ENSG00000128944.9	-4.7658	-4.4595	-8.3524	-6.7819
		ENSG00000136861.13	3.7169	6.0422	3.7607	2.3193			ENSG00000129422.9	-6.3627	-6.7052	-4.4466	-5.0334
		ENSG00000136938.8	5.5335	5.5617	4.1959	13.0923			ENSG00000129460.11	-2.5019	-6.4502	-12.674	-11.3218
		ENSG00000137075.13	2.5984	3.0787	3.6188	2.6857			ENSG00000130052.9	-2.7575	-5.4053	-9.4424	-3.1462
		ENSG00000137267.5	3.8228	3.281	3.2309	3.1642			ENSG00000130165.6	-4.844	-6.0861	-9.8815	-7.4533
		ENSG00000137449.11	3.1043	2.7947	2.9896	2.314			ENSG00000130222.6	-14.5769	-15.1595	-17.7775	-3.368
		ENSG00000137575.7	4.042	2.253	3.3849	3.3772			ENSG00000130713.11	-6.9265	-4.8505	-8.5852	-6.4071
		ENSG00000137693.9	5.5771	8.6872	11.081	13.1649			ENSG00000130811.6	-7.5233	-8.8691	-5.3192	-6.1332
		ENSG00000138028.10	2.7975	2.7738	4.9004	6.9011			ENSG00000131381.8	-3.9698	-4.3143	-3.3375	-5.5791
		ENSG00000138071.9	2.1326	11.5163	8.6641	2.4448			ENSG00000131732.7	-2.6732	-3.6092	-10.1186	-16.836
		ENSG00000138363.10	6.1943	6.5618	12.1878	8.8521			ENSG00000131773.9	-2.5061	-5.4147	-5.5238	-3.9373
		ENSG00000138668.14	2.0638	5.9292	3.6397	3.1554			ENSG00000131845.10	-6.811	-7.3834	-7.5623	-3.2642
		ENSG00000138835.18	2.5373	3.5224	6.3998	4.002			ENSG00000131910.4	-6.3489	-8.0648	-11.8351	-8.0863
		ENSG00000139154.10	3.0575	5.6197	4.1516	8.8891			ENSG00000132155.7	-4.807	-8.6088	-10.1711	-5.2704
		ENSG00000139163.11	4.4041	5.8085	4.0376	3.5066			ENSG00000132744.3	-2.5505	-3.9644	-8.7875	-18.2428
		ENSG00000139354.6	2.2271	2.9845	5.5156	8.8607			ENSG00000132793.7	-2.0035	-3.2345	-4.2534	-4.186
		ENSG00000140406.2	2.163	4.8446	7.172	5.522			ENSG00000132854.14	-2.8582	-6.9707	-16.5673	-12.466
		ENSG00000140650.7	2.2626	3.1658	3.5097	4.6337			ENSG00000133121.16	-6.2301	-9.4474	-9.4992	-6.4721
		ENSG00000141510.11	2.957	6.2568	8.3976	9.3283			ENSG00000133169.5	-3.0972	-2.814	-3.9834	-2.6846
		ENSG00000141522.7	2.3662	3.0051	5.6921	7.5781			ENSG00000133302.8	-7.4225	-9.6371	-6.4749	-5.9342
		ENSG00000141569.6	2.3619	5.023	5.3786	7.115			ENSG00000133316.11	-4.9418	-8.9854	-13.6539	-8.8828
		ENSG00000141582.10	4.2279	8.4272	6.5583	7.5165			ENSG00000133773.7	-3.0835	-8.5763	-8.2655	-5.427
		ENSG00000141854.3	2.7374	3.137	5.776	7.507			ENSG00000133800.4	-6.7029	-12.341	-40.1918	-12.8428
		ENSG00000141873.6	2.571	4.9903	1.7467	2.4789			ENSG00000134042.8	-2.5674	-10.3074	-11.6723	-14.8841
		ENSG00000142002.12	2.9182	4.2338	5.013	4.7693			ENSG00000134250.13	-2.7532	-5.3422	-8.1793	-3.5123
		ENSG00000142327.7	2.2158	5.6092	10.2446	3.0555			ENSG00000134419.11	-3.6673	-15.7957	-22.3967	-7.2713
		ENSG00000143178.8	3.0776	3.5866	2.4419	2.3162			ENSG00000134532.11	-2.7179	-8.098	-14.2151	-13.1463
		ENSG00000143367.11	2.1129	2.4794	5.8687	3.5028			ENSG00000135093.8	-3.1983	-6.324	-21.2252	-18.5521
		ENSG00000143390.13	2.6017	2.7081	3.3041	6.7619			ENSG00000135108.10	-5.6939	-2.9094	-9.8156	-3.268
		ENSG00000143476.13	3.6704	2.757	3.2056	2.4511			ENSG00000135441.3	-4.2406	-14.2398	-23.9312	-17.3783
		ENSG00000143498.13	2.2389	7.1731	7.7229	3.0281			ENSG00000135447.12	-5.4113	-10.1973	-35.4697	-45.7206
		ENSG00000143537.9	2.4176	2.621	3.9841	5.1559			ENSG00000135482.2	-3.9012	-6.2225	-12.817	-10.9227
		ENSG00000143614.7	2.2574	7.2729	6.8714	11.2556			ENSG00000135506.11	-6.5334	-5.7341	-11.4212	-19.434
		ENSG00000143801.12	3.2796	4.8348	6.4304	4.272			ENSG00000135597.14	-8.7449	-12.6931	-19.0065	-14.332
		ENSG00000143970.12	5.8498	8.0112	4.9008	14.4752			ENSG00000135643.4	-8.7011	-8.3556	-6.226	-6.7776
		ENSG00000144228.4	2.5377	3.4448	2.9879	2.8513			ENSG00000135655.9	-4.0277	-7.8592	-11.4907	-6.6379
		ENSG00000145414.4	3.4981	5.3859	7.5327	4.6631			ENSG00000135945.5	-3.5762	-6.7977	-7.5711	-4.2229
		ENSG00000145632.10	3.0758	4.0043	6.4189	3.7763			ENSG00000135972.4	-2.468	-6.0067	-9.3282	-6.095
		ENSG00000146535.9	2.4464	8.753	10.9284	5.3351			ENSG00000136169.12	-5.8844	-4.6014	-6.8951	-4.9295
		ENSG00000146540.10	2.3888	3.1159	3.546	7.044			ENSG00000136305.7	-4.4516	-12.1981	-21.7274	-19.1761
		ENSG00000146826.10	2.5161	7.933	5.5436	4.0438			ENSG00000136436.10	-4.4263	-8.7734	-18.434	-9.8143
		ENSG00000147324.6	3.1592	6.87	7.1801	5.6597			ENSG00000136478.3	-2.5684	-3.5519	-10.1393	-3.7962
		ENSG00000147416.6	3.4264	3.2061	3.8623	2.9904			ENSG00000136504.7	-5.6994	-4.1769	-8.9149	-6.7593
		ENSG00000148110.11	3.1483	3.1963	6.1591	3.9877			ENSG00000136527.13	-3.1105	-2.4315	-3.3093	-4.6782
		ENSG00000148154.5	2.6895	5.6549	4.4384	4.0489			ENSG00000136636.8	-3.6531	-8.7409	-14.9957	-10.4509
		ENSG00000149428.14	4.0659	4.6739	2.2291	4.222			ENSG00000136689.14	-4.1694	-12.088	-2.6587	-6.5541
		ENSG00000149573.4	3.4154	3.381	3.8837	3.0323			ENSG00000136709.7	-2.358	-8.8885	-5.2762	-19.0403
		ENSG00000151135.5	2.4408	3.7527	5.7397	3.769			ENSG00000136867.6	-9.6785	-9.6897	-9.4802	-2.3635
		ENSG00000151151.5	2.4563	3.2088	4.5706	4.5251			ENSG00000137133.6	-2.9881	-4.342	-13.846	-16.2328
		ENSG00000151176.3	2.0844	6.8192	8.8891	12.1076			ENSG00000137161.12	-8.6507	-16.4526	-37.3938	-21.293
		ENSG00000151773.8	3.4033	2.8527	3.4509	3.4269			ENSG00000137177.14	-3.0653	-2.8144	-2.4267	-9.9917
		ENSG00000151923.13	2.3756	7.35	5.9901	2.8286			ENSG00000137574.6	-2.4465	-6.2728	-5.2135	-3.4193
		ENSG00000151929.5	2.568	5.2061	6.7998	10.9559			ENSG00000137656.7	-8.2793	-8.8366	-9.2562	-6.3637
		ENSG00000152056.12	2.6204	4.5556	12.1615	4.6531			ENSG00000137700.12	-3.4795	-3.8643	-8.2186	-13.5256
		ENSG00000152291.9	2.2299	6.0706	12.4769	2.2096			ENSG00000137720.3	-4.5354	-16.2855	-28.5601	-22.0772
		ENSG00000152455.11	2.6239	3.914	4.8064	2.9702			ENSG00000138085.12	-2.5985	-13.2396	-11.1858	-6.9475
		ENSG00000152778.7	2.7196	5.7351	5.844	2.9696			ENSG00000138175.8	-2.9245	-7.0837	-7.0754	-2.4562
		ENSG00000153214.5	3.7596	2.7907	8.7856	7.2929			ENSG00000138286.10	-2.9375	-7.6501	-8.8404	-8.4681
		ENSG00000153560.7	7.6889	8.6248	7.3651	14.4707			ENSG00000138303.13	-2.2856	-11.3142	-6.0476	-3.3768
		ENSG00000153989.7	3.8785	4.3552	4.209	2.3656			ENSG00000138434.12	-2.0022	-7.9543	-14.3634	-9.1996
		ENSG00000154001.9	4.6568	3.7245	8.7602	6.6109			ENSG00000138640.10	-5.2826	-13.0961	-21.0824	-17.4335
		ENSG00000154978.8	2.9592	4.2524	7.6941	3.7759			ENSG00000138646.4	-8.1097	-13.2191	-9.7018	-10.5762
		ENSG00000155130.5	2.4054	3.7636	8.6852	8.3007			ENSG00000138670.12	-5.1242	-6.778	-4.3328	-7.9512
		ENSG00000155393.8	3.8112	2.5906	6.0873	4.6525			ENSG00000138678.6	-8.2704	-6.8598	-6.8238	-8.1122
		ENSG00000155970.7	4.0725	2.3375	4.0231	4.1219			ENSG00000138722.5	-11.3266	-16.9614	-11.1174	-2.2797
		ENSG00000156304.10	2.2392	5.0681	4.902	9.1577			ENSG00000138744.10	-3.6144	-8.5232	-23.5266	-22.6055
		ENSG00000156381.4	2.4483	2.872	2.3782	4.4298			ENSG00000138802.7	-3.6247	-8.8879	-22.213	-9.8643
		ENSG00000156504.12	2.7045	7.4382	4.7595	10.1442			ENSG00000139112.6	-4.652	-7.1709	-4.4228	-6.4825
		ENSG00000156639.7	2.2308	4.4263	4.5888	3.9505			ENSG00000139132.10	-5.989	-12.3814	-19.198	-8.0699
		ENSG00000157036.8	2.0907	6.7867	9.7479	3.5781			ENSG00000139597.12	-3.2869	-2.7315	-13.668	-11.2755
		ENSG00000157111.8	2.2344	5.804	4.2246	5.3901			ENSG00000139637.9	-3.6029	-7.0404	-5.538	-4.0859
		ENSG00000157837.11	3.3752	6.3167	8.2985	9.3523			ENSG00000139988.5	-4.9536	-4.4047	-5.8277	-2.8501
		ENSG00000157869.10	2.0748	4.1548	4.8949	2.735			ENSG00000140265.8	-2.5554	-3.5666	-2.6253	-3.9678
		ENSG00000157933.9	2.7139	6.5747	7.6889	8.4692			ENSG00000140382.10	-2.4765	-6.5722	-3.9229	-6.2704
		ENSG00000158321.11	2.3891	2.9955	2.1662	2.4906			ENSG00000140386.8	-2.3772	-3.8503	-5.5999	-2.7612
		ENSG00000158623.10	2.4453	4.2774	4.3955	7.8572			ENSG00000140396.8	-1.9611	-4.4444	-9.0616	-7.5939
		ENSG00000158710.10	2.6533	2.4891	6.946	4.0861			ENSG00000140943.12	-4.7781	-9.5717	-6.3743	-5.266
		ENSG00000158711.9	3.9401	6.4871	5.5596	5.0286			ENSG00000140990.10	-5.86	-12.9001	-13.5458	-5.0449
		ENSG00000158882.8	2.3755	2.8883	4.3755	5.0655			ENSG00000141027.16	-4.3115	-5.9829	-9.4658	-7.5298
		ENSG00000159110.15	7.3957	9.5363	9.6361	4.9859			ENSG00000141098.8	-2.9913	-5.7525	-8.6414	-10.798
		ENSG00000159363.13	2.4196	2.9717	7.8268	4.7888			ENSG00000141150.3	-2.059	-3.8534	-8.3992	-2.2519
		ENSG00000160209.14	4.5273	7.0929	10.5631	3.4439			ENSG00000141293.11	-2.5495	-5.3585	-6.1407	-9.8819
		ENSG00000160293.12	2.8241	2.8856	2.5799	2.2418			ENSG00000141698.12	-3.3038	-6.3955	-11.034	-11.6852
		ENSG00000160746.8	2.4393	3.4521	5.947	6.336			ENSG00000142534.2	-2.6567	-9.3359	-15.9151	-3.2732
		ENSG00000160789.15	3.8808	6.9295	10.4124	4.7074			ENSG00000142546.9	-3.2471	-9.1286	-4.7987	-7.9827
		ENSG00000160877.5	2.3398	7.9997	9.4473	3.0536			ENSG00000143164.11	-6.1756	-14.4109	-23.5635	-19.4699
		ENSG00000161513.7	2.2193	5.3249	4.594	3.2849			ENSG00000143196.4	-9.314	-3.3572	-9.6688	-3.4783
		ENSG00000161618.5	3.621	3.0569	5.0407	2.7816			ENSG00000143199.13	-7.4311	-6.3476	-15.5997	-13.0407
		ENSG00000162105.12	2.7291	4.318	5.1474	5.9512			ENSG00000143337.14	-3.6825	-6.9069	-24.5558	-6.8237
		ENSG00000162298.12	3.0863	4.0607	4.0466	4.8371			ENSG00000143420.13	-2.6472	-9.0325	-15.6786	-5.0186
		ENSG00000162645.8	2.3105	2.8931	3.9453	3.1122			ENSG00000143443.9	-3.581	-5.9698	-11.4154	-11.3496
		ENSG00000162695.7	2.5102	4.589	8.8803	7.6099			ENSG00000143486.11	-2.9253	-9.304	-11.3053	-9.4658
		ENSG00000162783.8	2.8106	3.7262	9.4768	7.1037			ENSG00000143578.11	-3.2322	-3.6136	-8.6879	-6.3941
		ENSG00000162923.10	3.5997	7.7943	11.7128	11.7748			ENSG00000143845.10	-10.4948	-10.169	-15.9402	-19.5306
		ENSG00000162959.9	3.6077	5.056	4.5159	6.5623			ENSG00000143869.5	-2.1563	-3.3519	-2.3595	-6.0253
		ENSG00000163071.6	2.6614	3.2074	4.5493	4.8903			ENSG00000143995.15	-7.5844	-6.2939	-5.7915	-3.8363
		ENSG00000163517.10	2.6619	3.7984	6.0204	10.6547			ENSG00000144021.2	-2.0007	-4.4943	-9.1083	-4.1547
		ENSG00000163545.7	2.5159	2.7083	8.1958	4.4005			ENSG00000144057.11	-3.765	-3.5239	-4.6016	-3.01
		ENSG00000163755.4	2.3463	3.3771	5.8703	7.4091			ENSG00000144445.11	-4.3885	-6.3682	-7.7177	-6.8361
		ENSG00000163820.10	2.9805	4.9392	8.443	5.2126			ENSG00000144647.5	-6.7038	-6.0366	-6.3015	-4.0837
		ENSG00000163875.11	1.999	2.1972	7.6184	6.8053			ENSG00000144713.8	-2.572	-7.7325	-13.8791	-8.8597
		ENSG00000164070.7	2.494	4.3684	3.373	6.3325			ENSG00000144820.3	-2.1764	-4.7079	-6.9351	-6.3496
		ENSG00000164091.7	2.1638	3.4158	4.9327	3.1881			ENSG00000144824.15	-4.2924	-9.5598	-15.8294	-12.7957
		ENSG00000164244.16	3.3494	4.8895	5.4133	4.0464			ENSG00000144852.12	-7.0469	-6.9222	-11.6123	-16.2822
		ENSG00000164332.6	2.3026	5.1366	6.656	6.3024			ENSG00000144891.13	-2.4546	-3.2009	-5.9034	-5.1392
		ENSG00000164663.9	2.9223	4.2727	4.2511	2.6696			ENSG00000144909.7	-9.911	-9.9877	-8.2918	-4.0128
		ENSG00000164818.11	2.3309	3.1625	5.1311	4.9512			ENSG00000145020.10	-3.5486	-3.7666	-17.7583	-17.9131
		ENSG00000164938.9	1.8865	3.942	7.7059	3.0309			ENSG00000145241.6	-3.4262	-11.2547	-11.8895	-5.6431
		ENSG00000165215.5	3.4756	3.6641	2.9687	3.929			ENSG00000145349.12	-2.6875	-5.0745	-9.5792	-3.0065
		ENSG00000165376.6	4.1581	5.6531	4.4482	3.7423			ENSG00000145391.9	-3.8641	-10.1302	-8.0022	-6.6956
		ENSG00000165389.6	2.7151	2.9248	5.5294	7.0658			ENSG00000145708.6	-1.9291	-8.6578	-16.0482	-39.216
		ENSG00000165527.5	2.8495	6.3197	6.3032	3.0286			ENSG00000145741.11	-3.5766	-7.8749	-11.7193	-7.1789
		ENSG00000166033.7	2.7131	4.7324	5.1821	6.8259			ENSG00000145850.4	-4.2211	-4.8178	-4.8589	-14.8053
		ENSG00000166145.10	2.4067	2.8019	4.0541	8.138			ENSG00000146166.12	-3.8694	-4.4891	-20.7521	-25.1693
		ENSG00000166340.10	4.2319	6.5217	5.2197	7.1274			ENSG00000146411.5	-3.2926	-4.2489	-15.0071	-6.9547
		ENSG00000166913.8	4.7159	4.4901	5.3655	4.0624			ENSG00000146521.5	-3.2133	-2.9965	-3.418	-12.455
		ENSG00000167106.7	2.7944	2.5733	3.0727	4.5739			ENSG00000146776.10	-7.5725	-8.2813	-12.447	-2.8669
		ENSG00000167114.8	2.3947	3.2517	5.1825	6.5801			ENSG00000146963.13	-2.6551	-3.4249	-5.8382	-2.644
		ENSG00000167363.9	2.2818	2.769	3.7434	2.7115			ENSG00000147140.11	-4.0472	-6.1612	-8.4072	-6.6072
		ENSG00000167553.10	2.4698	2.9205	7.7361	2.6978			ENSG00000147274.10	-3.1044	-2.7599	-6.2977	-3.1758
		ENSG00000167881.10	4.138	4.264	3.3488	3.5235			ENSG00000147475.10	-2.1012	-5.3087	-7.567	-8.271
		ENSG00000167930.11	1.9191	3.5111	5.4327	2.6614			ENSG00000147576.11	-2.0695	-3.927	-8.1959	-7.7854
		ENSG00000168065.11	2.3112	3.2742	5.1972	2.1559			ENSG00000147642.12	-13.7535	-11.7187	-12.2382	-6.8319
		ENSG00000168140.4	2.0393	7.6602	9.906	4.1817			ENSG00000147677.6	-2.361	-5.0998	-10.5916	-4.4309
		ENSG00000168528.7	2.5009	5.9582	5.5099	7.4791			ENSG00000148187.13	-4.8484	-10.9528	-9.7066	-7.3663
		ENSG00000168899.4	2.5316	3.42	4.4292	4.636			ENSG00000148498.11	-7.1039	-14.1366	-9.1262	-4.9775
		ENSG00000169221.9	3.1567	5.5974	5.913	7.1835			ENSG00000148965.4	-3.4951	-3.0045	-1.7213	-5.9682
		ENSG00000169564.5	4.7444	7.0684	8.0247	8.5146			ENSG00000149124.6	-2.7209	-4.2303	-26.7054	-43.3645
		ENSG00000169570.5	3.4104	2.9373	3.1308	2.7272			ENSG00000149474.9	-2.7024	-11.1436	-7.5503	-6.2481
		ENSG00000169856.7	3.1456	4.4941	5.6147	3.0006			ENSG00000149742.5	-3.5482	-4.827	-22.2607	-8.6193
		ENSG00000169991.6	2.7223	5.8207	6.9381	4.684			ENSG00000149970.10	-6.5157	-8.2814	-13.0538	-7.7901
		ENSG00000170035.11	2.3365	5.0434	5.5864	6.2935			ENSG00000150048.6	-8.7583	-7.345	-5.9145	-2.9689
		ENSG00000170113.11	2.5941	5.809	7.9976	6.4263			ENSG00000150656.10	-3.2081	-9.288	-32.757	-40.5051
		ENSG00000170144.14	2.5408	4.7001	7.3778	7.9502			ENSG00000150722.6	-2.6888	-10.5316	-9.5998	-10.6594
		ENSG00000170421.7	4.0987	6.7587	10.3597	7.467			ENSG00000150907.6	-7.8042	-13.7034	-13.9718	-4.4831
		ENSG00000170485.12	3.2431	2.7059	4.2127	5.9348			ENSG00000151320.6	-4.0792	-5.4436	-17.1297	-10.1565
		ENSG00000170500.8	2.9973	6.698	4.8291	8.7285			ENSG00000151332.14	-2.3192	-4.6905	-5.9508	-7.2461
		ENSG00000170775.2	5.3575	3.0572	4.3666	4.2295			ENSG00000151353.10	-5.2351	-8.9169	-10.2389	-13.7859
		ENSG00000171017.6	2.469	4.6247	6.4276	4.1853			ENSG00000151500.10	-2.8104	-8.7312	-14.4018	-9.5213
		ENSG00000171056.6	2.0892	2.4605	3.3098	2.4216			ENSG00000151623.10	-3.5936	-3.7221	-15.1236	-13.9909
		ENSG00000171224.7	3.5005	3.7125	5.0146	3.9872			ENSG00000152270.4	-4.4847	-7.8448	-5.9571	-7.4854
		ENSG00000171262.7	2.9694	4.4634	5.0931	7.4502			ENSG00000152443.8	-2.4656	-3.6316	-7.2522	-5.4868
		ENSG00000171298.8	3.4624	3.548	4.495	4.7101			ENSG00000152464.10	-2.7155	-7.0264	-6.8087	-4.1778
		ENSG00000171475.9	2.9163	9.2143	7.5808	11.7067			ENSG00000152580.8	-4.9277	-3.0934	-5.9094	-4.9535
		ENSG00000171604.7	3.2806	4.148	6.6295	2.4191			ENSG00000152779.12	-9.4651	-6.1599	-5.7408	-7.4902
		ENSG00000171617.9	3.9662	4.6319	3.1198	2.4284			ENSG00000152894.10	-2.3712	-4.0459	-8.471	-4.1305
		ENSG00000172270.14	2.6637	5.5348	4.8164	7.3034			ENSG00000153086.9	-5.5433	-12.2658	-9.5688	-16.8237
		ENSG00000172354.5	2.1651	8.3366	6.4041	5.0729			ENSG00000153162.8	-9.9781	-9.7056	-8.5117	-4.7343
		ENSG00000172667.6	7.1623	11.0364	7.6392	5.2528			ENSG00000153487.11	-6.8291	-8.5759	-12.1494	-6.1017
		ENSG00000172738.7	2.2443	3.6831	7.7318	2.7822			ENSG00000153707.11	-3.1974	-3.7647	-5.2753	-3.293
		ENSG00000172954.9	3.371	4.4349	2.3644	3.267			ENSG00000153721.13	-3.1578	-5.584	-11.5467	-9.9053
		ENSG00000173212.4	2.43	7.3196	4.4498	6.9965			ENSG00000153823.14	-4.3645	-7.9701	-12.8022	-10.5886
		ENSG00000173456.4	3.2792	4.4199	5.2265	3.645			ENSG00000153933.5	-5.1803	-5.184	-4.3104	-5.1277
		ENSG00000173542.4	2.6272	5.3475	4.7544	8.1345			ENSG00000153993.9	-3.9861	-3.197	-8.6455	-2.4187
		ENSG00000173812.6	3.1194	3.4977	3.0478	3.2178			ENSG00000154114.8	-11.1004	-17.7092	-17.6823	-4.9292
		ENSG00000174093.6	3.1959	4.1384	3.1136	5.5488			ENSG00000154144.8	-3.571	-2.6471	-2.8928	-8.5158
		ENSG00000174307.5	2.3406	4.4746	9.4154	7.1977			ENSG00000154269.10	-2.613	-4.199	-18.0051	-14.1701
		ENSG00000174327.6	4.7794	4.1218	3.9258	2.8519			ENSG00000154309.7	-2.6687	-4.3006	-5.3625	-8.1299
		ENSG00000174437.12	5.7069	5.3038	2.0322	3.9461			ENSG00000154654.10	-2.89	-23.3514	-24.5516	-20.6356
		ENSG00000174695.5	3.1094	3.0225	3.8713	3.4575			ENSG00000154957.9	-2.6726	-5.9119	-5.4677	-4.2493
		ENSG00000174749.5	2.4807	3.8865	4.8643	6.628			ENSG00000155463.8	-3.3781	-9.5931	-6.6297	-14.0271
		ENSG00000175567.4	2.1889	3.7877	2.7123	5.5582			ENSG00000155744.5	-1.8568	-4.0955	-10.5137	-4.6568
		ENSG00000175582.15	2.7498	4.5429	6.8659	7.3853			ENSG00000156218.8	-3.1764	-5.5793	-16.3307	-23.5807
		ENSG00000175727.9	3.5217	6.0563	10.3961	8.8048			ENSG00000156298.8	-2.2404	-7.2904	-16.6042	-12.6788
		ENSG00000175826.7	3.1372	5.1099	7.2516	14.6666			ENSG00000156463.13	-4.5849	-2.9779	-16.3167	-11.8368
		ENSG00000176273.10	5.2547	3.2438	4.2713	3.6562			ENSG00000156482.6	-2.907	-10.6607	-19.0759	-11.6849
		ENSG00000176597.7	3.9628	2.7022	4.2519	6.8846			ENSG00000156502.9	-2.6809	-3.85	-9.6528	-7.674
		ENSG00000176619.6	2.069	2.8905	8.2353	4.9683			ENSG00000156802.8	-7.9663	-4.1424	-7.0136	-3.2578
		ENSG00000176890.11	7.8172	2.8574	5.0019	7.265			ENSG00000156869.8	-3.8491	-8.8364	-15.6514	-13.8473
		ENSG00000176912.3	3.8848	4.9029	2.8875	2.7136			ENSG00000157077.10	-2.8675	-8.6989	-11.8295	-8.5887
		ENSG00000177045.6	2.6338	3.0901	3.4676	3.6252			ENSG00000157429.11	-4.2707	-3.5537	-5.7865	-2.7606
		ENSG00000177303.5	2.7752	2.0331	5.112	8.0831			ENSG00000157796.13	-4.0188	-4.4559	-4.2696	-3.2021
		ENSG00000177426.16	2.3047	3.6518	7.7641	2.2906			ENSG00000158077.4	-3.7378	-10.0715	-20.3984	-6.6241
		ENSG00000177459.6	2.619	3.3334	5.4039	5.2528			ENSG00000158169.7	-3.5106	-7.4919	-29.3138	-29.1696
		ENSG00000177485.6	3.4791	5.0466	6.2658	3.6595			ENSG00000158292.6	-5.7529	-5.2372	-4.3466	-4.4936
		ENSG00000177697.13	2.9379	2.5647	5.8356	5.6457			ENSG00000158301.14	-3.2133	-9.2789	-17.1332	-7.2456
		ENSG00000177733.4	2.5283	4.6698	4.7724	3.766			ENSG00000158457.4	-2.9925	-6.5017	-18.9008	-12.4771
		ENSG00000177951.13	3.0916	5.2204	5.3235	3.1518			ENSG00000158526.7	-4.1118	-9.2505	-9.9382	-5.3228
		ENSG00000178209.10	3.1743	2.3518	4.0452	4.4288			ENSG00000158552.8	-2.2102	-7.705	-13.457	-9.1899
		ENSG00000178573.6	4.8292	4.1218	2.7671	5.3726			ENSG00000158639.7	-2.2708	-5.2075	-8.6753	-5.0194
		ENSG00000178691.6	1.9883	2.7496	3.4613	3.3587			ENSG00000158793.9	-2.509	-4.8415	-10.4612	-21.1438
		ENSG00000178951.4	2.4999	6.2422	7.7823	6.6418			ENSG00000159111.8	-6.3591	-4.1532	-6.2399	-3.942
		ENSG00000179403.10	2.5914	3.6569	6.3197	6.6924			ENSG00000159208.11	-4.5525	-15.5847	-9.6486	-6.4368
		ENSG00000179630.6	3.2068	4.0479	6.9478	5.2585			ENSG00000159256.8	-2.6829	-5.1869	-7.8136	-5.2305
		ENSG00000179979.7	3.348	4.7702	2.7204	2.7843			ENSG00000159261.6	-4.88	-8.5697	-22.0577	-30.3323
		ENSG00000180190.7	4.4481	6.0174	3.046	3.3979			ENSG00000159348.8	-2.7215	-4.4231	-4.7712	-8.6955
		ENSG00000180233.9	4.286	3.4809	4.5626	2.2802			ENSG00000160194.13	-5.0011	-5.4721	-6.7546	-15.8608
		ENSG00000180370.6	2.8649	5.2643	8.2507	9.9377			ENSG00000160339.11	-2.1841	-6.0021	-10.1195	-9.2246
		ENSG00000180801.11	2.4571	3.1775	5.471	8.3236			ENSG00000160714.5	-2.425	-4.8404	-2.9849	-2.4761
		ENSG00000180900.12	2.0739	4.6606	5.0268	4.1247			ENSG00000160783.15	-2.1691	-6.47	-13.439	-10.8212
		ENSG00000180957.13	2.1182	3.8854	3.8728	4.8584			ENSG00000161132.6	-4.5066	-7.1747	-6.2672	-4.9859
		ENSG00000181026.13	4.8959	6.1919	6.8711	5.6515			ENSG00000161981.6	-5.3675	-16.1577	-9.0794	-13.7327
		ENSG00000181222.10	2.8819	5.7722	10.2977	6.5728			ENSG00000162384.9	-3.3374	-7.6446	-9.452	-8.0325
		ENSG00000181284.2	2.5105	3.7006	4.3325	2.8801			ENSG00000162391.7	-8.8736	-14.9301	-15.2328	-14.625
		ENSG00000181467.2	2.2976	2.3475	5.0454	4.54			ENSG00000162407.8	-12.912	-17.4209	-28.7224	-13.1558
		ENSG00000181588.15	2.1952	2.4461	2.0337	3.7075			ENSG00000162434.7	-9.8253	-6.1038	-8.5972	-12.9852
		ENSG00000181619.11	3.4665	4.1317	7.4818	3.8424			ENSG00000162692.6	-7.5466	-9.757	-8.2263	-9.604
		ENSG00000181827.10	5.6559	6.4514	6.9479	8.1983			ENSG00000162702.7	-2.895	-4.72	-16.522	-6.6459
		ENSG00000181885.14	3.9976	3.8362	5.1919	3.3444			ENSG00000162852.9	-4.7622	-9.6646	-24.4423	-30.7827
		ENSG00000181904.8	5.6457	8.8153	7.6433	4.2087			ENSG00000162961.9	-2.2403	-7.297	-11.5319	-7.0432
		ENSG00000182158.10	2.3927	4.0019	8.4061	5.0659			ENSG00000162989.3	-2.2687	-9.9145	-15.5201	-11.7336
		ENSG00000183087.10	2.8194	4.3507	6.9226	8.8523			ENSG00000162997.11	-2.2058	-3.3959	-6.2379	-9.8481
		ENSG00000183337.12	2.7346	4.9819	4.8132	4.4254			ENSG00000163155.7	-2.4395	-3.3342	-4.2101	-5.6576
		ENSG00000183495.9	2.0687	4.4702	6.5275	7.8595			ENSG00000163156.7	-3.0181	-5.735	-3.8127	-2.3901
		ENSG00000184743.8	4.8798	8.9225	7.0813	4.8493			ENSG00000163382.7	-3.2042	-5.7137	-5.9763	-9.7651
		ENSG00000184840.7	2.5039	3.3049	5.183	2.5732			ENSG00000163386.16	-8.899	-10.7252	-11.6843	-4.8408
		ENSG00000184860.5	2.1644	2.981	4.8241	3.3418			ENSG00000163481.3	-3.7279	-6.5139	-6.2644	-4.1193
		ENSG00000185088.8	4.3313	4.5783	6.388	2.2676			ENSG00000163491.12	-9.0676	-14.1489	-14.0917	-3.555
		ENSG00000185129.4	9.7482	6.8034	9.6684	2.8637			ENSG00000163644.10	-6.0148	-10.4322	-10.3401	-12.0551
		ENSG00000185238.8	2.5569	4.1769	3.3373	4.5949			ENSG00000163710.3	-5.7592	-13.8717	-32.6129	-38.9609
		ENSG00000185305.6	2.9651	3.8276	4.8237	3.3247			ENSG00000163749.13	-2.1026	-6.5005	-11.8846	-6.0334
		ENSG00000185507.15	2.3756	4.7074	2.7538	3.4646			ENSG00000163815.5	-4.5779	-8.024	-12.5024	-11.6956
		ENSG00000185515.10	2.0814	3.4366	2.1782	2.2119			ENSG00000163884.3	-7.3603	-13.3069	-19.7859	-14.9179
		ENSG00000185551.8	2.0977	4.9964	6.6273	9.8479			ENSG00000163904.8	-4.4083	-7.379	-9.0516	-13.3529
		ENSG00000185561.8	2.891	6.6011	3.5293	4.2515			ENSG00000164010.9	-2.3362	-3.1005	-7.469	-9.0579
		ENSG00000185761.6	2.6642	6.8827	6.0971	3.1834			ENSG00000164080.9	-6.3095	-10.8341	-18.1991	-39.9172
		ENSG00000186074.14	2.3209	2.3829	5.8836	5.2357			ENSG00000164128.2	-2.3808	-7.1479	-7.2728	-7.0389
		ENSG00000186283.9	4.5696	2.8177	3.81	2.632			ENSG00000164291.12	-5.6156	-6.4248	-5.7712	-2.3143
		ENSG00000186834.2	4.4754	2.2437	5.6025	6.2268			ENSG00000164318.13	-3.7395	-10.7791	-16.0648	-6.299
		ENSG00000187164.13	5.7201	8.0856	12.2034	7.2144			ENSG00000164609.5	-2.2872	-6.5647	-5.6248	-2.4802
		ENSG00000187653.10	4.5919	2.5512	3.1954	5.0937			ENSG00000164626.8	-4.5353	-6.7562	-16.3827	-6.9214
		ENSG00000188021.7	2.4571	8.5689	8.2188	2.7473			ENSG00000164654.11	-7.1719	-12.9179	-12.9312	-16.4177
		ENSG00000188157.9	3.336	3.4073	8.0909	7.8025			ENSG00000164758.3	-4.0797	-8.8269	-4.486	-4.8783
		ENSG00000188290.6	2.0286	3.0317	4.9135	3.161			ENSG00000165219.17	-3.3977	-4.7713	-8.9023	-6.6873
		ENSG00000188483.6	2.4081	3.6367	7.5624	7.7348			ENSG00000165449.7	-6.3758	-7.5537	-6.4843	-8.0918
		ENSG00000188522.10	3.8485	7.3805	4.9663	6.4584			ENSG00000165457.9	-2.357	-4.3997	-3.5836	-3.2746
		ENSG00000188549.8	2.6851	2.9477	5.0314	7.9976			ENSG00000165494.6	-1.878	-2.6749	-5.8106	-3.4167
		ENSG00000188895.7	3.4971	5.2769	7.9954	2.6742			ENSG00000165502.6	-2.4943	-6.0586	-14.245	-7.0227
		ENSG00000188971.4	4.8366	5.8789	9.5128	7.3986			ENSG00000165511.4	-3.5852	-5.1321	-9.9813	-4.5247
		ENSG00000196233.7	3.6618	3.9893	4.9486	4.944			ENSG00000165775.13	-2.8225	-9.5376	-7.565	-5.0427
		ENSG00000196428.8	2.5915	5.5048	6.5891	4.7752			ENSG00000165966.10	-6.316	-4.1162	-7.2552	-2.5397
		ENSG00000196586.9	2.3699	6.3218	6.1355	12.4192			ENSG00000165995.14	-4.5785	-7.9907	-7.8717	-2.7076
		ENSG00000197045.8	2.7389	3.9321	3.6163	6.2031			ENSG00000166025.13	-8.9415	-11.2265	-24.8058	-10.9369
		ENSG00000197077.8	3.634	5.0188	6.1188	3.5171			ENSG00000166037.6	-2.4845	-5.0447	-7.0271	-4.815
		ENSG00000197111.11	2.9599	5.144	5.2065	5.1618			ENSG00000166136.11	-4.4105	-10.5223	-10.839	-11.5823
		ENSG00000197136.4	2.3607	7.1531	4.4764	3.4174			ENSG00000166199.8	-4.6081	-6.268	-9.5002	-8.5646
		ENSG00000197150.8	2.3552	5.0213	4.618	2.7586			ENSG00000166228.4	-2.1961	-7.8671	-21.3743	-11.5277
		ENSG00000197324.4	1.9663	5.5264	11.2116	12.9573			ENSG00000166272.12	-8.6686	-13.1072	-12.7411	-5.2595
		ENSG00000197405.3	2.4962	6.7323	5.8946	3.9847			ENSG00000166278.10	-2.3115	-6.012	-10.3285	-12.4682
		ENSG00000197429.6	2.6614	3.3671	2.8338	4.4943			ENSG00000166289.5	-5.4979	-8.5782	-6.0412	-6.8001
		ENSG00000197536.6	3.4985	3.785	2.0837	2.4778			ENSG00000166292.7	-8.4221	-9.071	-6.7143	-4.7285
		ENSG00000197822.6	2.6953	5.4728	3.0513	2.6244			ENSG00000166321.9	-2.5979	-5.9437	-7.8015	-9.583
		ENSG00000197879.10	2.8947	2.7583	5.8552	11.3044			ENSG00000166348.13	-21.806	-13.0797	-18.8329	-3.6931
		ENSG00000197930.8	3.525	6.0347	5.1514	3.4467			ENSG00000166439.5	-2.0247	-3.7981	-6.0868	-4.3095
		ENSG00000198018.6	4.1787	4.4816	7.8615	3.3159			ENSG00000166454.5	-2.3842	-6.013	-10.0492	-4.1381
		ENSG00000198053.7	3.1412	4.3662	8.1159	9.292			ENSG00000166478.5	-5.0901	-6.285	-4.6812	-3.0936
		ENSG00000198074.5	2.7639	3.5495	11.6526	4.7903			ENSG00000166526.12	-6.7606	-2.4702	-5.9532	-5.7393
		ENSG00000198246.7	2.2541	4.0928	7.1599	4.7281			ENSG00000166582.5	-2.5044	-4.1271	-13.2399	-18.6252
		ENSG00000198380.8	3.403	3.1828	6.1285	3.0291			ENSG00000166780.6	-6.0808	-8.2892	-11.2411	-9.9706
		ENSG00000198466.8	2.5351	3.7603	3.1603	3.627			ENSG00000166902.4	-2.3093	-4.4444	-6.0259	-6.6629
		ENSG00000198689.5	2.1979	2.7422	3.728	4.0424			ENSG00000166922.4	-3.8549	-3.4469	-17.7671	-20.4773
		ENSG00000198763.3	7.6817	4.2352	2.8574	2.4732			ENSG00000166974.8	-3.6294	-3.6681	-3.19	-2.4341
		ENSG00000198786.2	19.8729	13.4272	12.8406	9.8187			ENSG00000167112.7	-2.7404	-4.9974	-5.5615	-12.1511
		ENSG00000198792.8	2.471	4.232	8.9301	6.5002			ENSG00000167186.6	-2.3704	-6.3339	-7.1175	-4.8042
		ENSG00000198824.4	2.5353	6.0108	6.6264	6.2726			ENSG00000167202.7	-2.5203	-3.681	-2.4519	-2.6078
		ENSG00000198888.2	10.7797	6.6448	4.7726	5.507			ENSG00000167232.9	-2.7908	-4.5683	-6.1774	-2.7707
		ENSG00000198900.5	5.5908	4.8293	4.5649	8.4505			ENSG00000167397.10	-2.204	-3.727	-8.3397	-8.2893
		ENSG00000200087.1	3.4832	6.9831	2.529	4.4263			ENSG00000167447.8	-2.8907	-3.1463	-4.2642	-8.0981
		ENSG00000202533.1	3.1166	11.2305	3.0549	3.6153			ENSG00000167468.12	-4.6208	-10.3429	-9.0593	-15.6143
		ENSG00000203883.5	2.4541	3.4689	6.7779	4.7697			ENSG00000167740.5	-4.7879	-7.4075	-20.0449	-13.3692
		ENSG00000204217.8	2.4407	2.9728	2.6289	4.9407			ENSG00000167780.7	-3.6348	-4.961	-11.1503	-3.1658
		ENSG00000204516.5	2.3741	2.7979	2.2798	2.3268			ENSG00000167785.4	-3.5942	-3.8004	-4.8164	-5.0667
		ENSG00000204790.8	2.5607	6.6839	6.6448	5.1848			ENSG00000168077.9	-4.6348	-12.4766	-12.193	-7.9094
		ENSG00000205534.5	2.2886	5.4949	4.9691	9.2656			ENSG00000168079.12	-6.6291	-14.5294	-9.5918	-10.6041
		ENSG00000205730.5	5.8861	3.5528	6.7335	5.9883			ENSG00000168118.7	-2.8523	-7.6827	-7.6381	-7.163
		ENSG00000207233.1	3.0021	2.4819	3.0004	2.7488			ENSG00000168310.6	-4.6505	-7.4839	-7.2822	-10.4166
		ENSG00000207445.1	5.7977	4.8219	3.0267	4.9431			ENSG00000168538.11	-3.1446	-7.7088	-6.565	-6.5948
		ENSG00000207771.1	2.2431	4.4425	3.2203	2.6768			ENSG00000168675.14	-2.495	-4.8318	-8.343	-6.157
		ENSG00000207967.1	3.4178	2.7846	2.5925	5.531			ENSG00000168679.13	-3.3944	-4.0998	-5.0227	-5.7056
		ENSG00000208772.1	5.8543	3.0669	2.3466	2.7969			ENSG00000168734.9	-4.0158	-10.2997	-14.5789	-6.9841
		ENSG00000210082.2	8.6224	6.0444	11.8547	16.6539			ENSG00000168746.6	-5.3006	-5.4993	-9.4708	-2.1054
		ENSG00000212024.2	2.614	3.9447	2.0845	2.4964			ENSG00000168813.12	-2.2977	-2.0807	-3.6074	-3.2926
		ENSG00000213024.6	2.2428	5.1435	5.8805	7.025			ENSG00000168872.11	-3.4721	-4.2135	-2.6023	-8.771
		ENSG00000213064.5	4.2851	8.9061	7.3048	3.693			ENSG00000168887.6	-5.8631	-4.8963	-8.117	-5.3237
		ENSG00000213214.3	3.4894	6.658	5.046	4.8751			ENSG00000168944.11	-3.2555	-9.871	-9.2215	-6.542
		ENSG00000213639.5	3.1249	3.9259	4.722	3.0556			ENSG00000169084.8	-2.4822	-5.1133	-10.8805	-8.4108
		ENSG00000213860.3	3.8197	5.6982	4.0349	4.6103			ENSG00000169242.7	-2.0705	-4.0155	-2.6167	-3.2601
		ENSG00000213886.3	2.0507	2.2291	4.6845	2.9368			ENSG00000169371.9	-2.3799	-5.2962	-5.8708	-3.8749
		ENSG00000218283.2	2.1853	3.8879	4.674	6.4369			ENSG00000169372.8	-2.5066	-5.7392	-16.9882	-11.8649
		ENSG00000218739.5	2.4348	4.5176	2.3299	2.407			ENSG00000169418.9	-2.7696	-9.4083	-8.8552	-4.163
		ENSG00000219665.4	1.964	3.4851	5.8262	2.8872			ENSG00000169562.9	-2.2396	-5.0405	-9.0385	-12.4512
		ENSG00000220749.3	3.8635	7.798	5.6144	4.1444			ENSG00000169599.8	-2.2165	-6.5379	-5.2991	-7.8603
		ENSG00000221491.2	3.0412	5.3746	2.5164	6.1556			ENSG00000169621.5	-4.3673	-8.3507	-7.1013	-3.5843
		ENSG00000221955.6	3.0122	2.6068	4.3687	2.7665			ENSG00000169740.9	-2.1836	-10.0079	-18.2517	-12.6168
		ENSG00000222041.6	2.3718	2.2787	5.8331	5.4731			ENSG00000169752.12	-2.0642	-3.8259	-3.9132	-3.4234
		ENSG00000223482.3	8.5827	4.4015	4.3525	4.1271			ENSG00000169955.6	-2.1004	-2.7765	-9.2043	-8.2521
		ENSG00000223612.2	2.274	2.6319	3.2732	4.0902			ENSG00000170085.13	-7.3056	-8.5122	-7.7447	-5.6608
		ENSG00000224597.5	3.1824	2.9134	6.4799	4.3358			ENSG00000170145.4	-2.1413	-6.983	-12.934	-11.9119
		ENSG00000225135.1	2.3283	6.2401	4.2046	3.6025			ENSG00000170185.5	-2.9627	-4.7088	-9.6024	-4.0897
		ENSG00000225345.3	2.1437	4.0296	3.1701	2.9467			ENSG00000170222.11	-15.1765	-23.4252	-22.7543	-16.0684
		ENSG00000226640.2	2.2589	2.764	6.7889	3.3675			ENSG00000170271.6	-2.5293	-8.6933	-33.7418	-26.8929
		ENSG00000227240.1	3.613	4.4756	5.948	5.0895			ENSG00000170291.10	-2.858	-4.4912	-8.391	-13.6254
		ENSG00000227345.4	2.8428	3.8164	7.6767	5.6132			ENSG00000170310.10	-2.8816	-7.4855	-7.1402	-9.6743
		ENSG00000229955.1	4.0547	6.2564	4.1635	7.4082			ENSG00000170364.8	-3.4419	-5.6261	-6.2813	-4.4878
		ENSG00000230734.1	2.9915	6.2297	3.3617	2.307			ENSG00000170615.10	-8.9612	-9.13	-8.0576	-2.7669
		ENSG00000232034.1	4.6004	3.7132	3.6185	5.4944			ENSG00000170743.12	-2.0724	-8.1714	-4.3467	-8.7295
		ENSG00000233016.2	5.9535	3.054	2.9138	4.9299			ENSG00000170791.13	-3.2752	-6.931	-10.9363	-13.4233
		ENSG00000233038.1	3.0888	4.6571	3.3013	3.2337			ENSG00000170871.7	-2.6748	-4.2498	-8.2756	-3.0246
		ENSG00000233695.1	2.3662	3.9443	4.1487	2.9522			ENSG00000171109.14	-2.9692	-5.0188	-1.9023	-3.0923
		ENSG00000234678.1	3.2373	5.6958	4.5867	3.1771			ENSG00000171227.6	-9.8742	-6.4409	-15.5482	-7.4742
		ENSG00000234771.2	2.6966	2.8665	3.6384	5.4977			ENSG00000171408.9	-7.165	-10.9406	-8.9895	-9.9901
		ENSG00000234886.1	2.2081	3.7103	4.1253	4.1645			ENSG00000171428.9	-2.974	-5.9803	-12.6861	-22.1486
		ENSG00000235437.3	2.0904	4.9058	5.6256	3.7003			ENSG00000171490.8	-2.269	-4.8091	-10.2117	-5.2114
		ENSG00000236459.1	2.3714	4.6041	2.9439	2.5637			ENSG00000171720.5	-3.8939	-6.0274	-17.4009	-12.1192
		ENSG00000237523.1	2.8419	4.6092	7.2365	2.5186			ENSG00000171793.9	-6.1755	-9.5165	-14.4718	-10.4112
		ENSG00000237973.1	6.3595	3.988	4.5254	3.3304			ENSG00000172053.10	-4.135	-6.9914	-4.9217	-3.0275
		ENSG00000237978.1	3.078	2.9858	3.0441	2.6382			ENSG00000172456.12	-2.2266	-4.2341	-5.0375	-11.3048
		ENSG00000239183.1	4.2656	9.4324	5.1498	6.6171			ENSG00000172748.8	-2.5843	-2.5747	-4.4887	-4.0365
		ENSG00000239264.4	2.3754	7.4058	8.0853	3.7848			ENSG00000172775.12	-3.6246	-2.9541	-3.3399	-4.2699
		ENSG00000240233.2	2.472	2.071	2.8407	2.4065			ENSG00000172809.8	-5.4646	-9.7266	-14.3836	-10.3678
		ENSG00000241886.1	2.8072	4.306	6.4118	2.3893			ENSG00000172824.10	-4.235	-3.2813	-7.2177	-7.5726
		ENSG00000242125.2	2.619	2.5067	2.8378	5.1413			ENSG00000172943.14	-2.4057	-3.3167	-7.0351	-5.4526
		ENSG00000243317.3	3.1305	3.7256	2.5707	2.7099			ENSG00000172992.7	-2.4564	-3.3721	-7.3808	-10.4047
		ENSG00000243449.2	2.1353	3.3943	3.9698	3.2063			ENSG00000173141.4	-3.0439	-10.6034	-20.5211	-13.0128
		ENSG00000243646.4	4.7259	5.7544	4.9713	3.1605			ENSG00000173334.3	-7.9588	-2.6004	-4.4542	-3.6097
		ENSG00000244694.3	2.0858	3.2014	4.5895	4.8792			ENSG00000173545.4	-2.042	-4.7314	-4.923	-4.3457
		ENSG00000247081.3	2.9625	3.6406	5.4775	2.9622			ENSG00000173757.5	-2.5949	-9.3746	-10.729	-7.1465
		ENSG00000247844.1	2.2972	2.1754	7.0395	4.547			ENSG00000173848.14	-4.8412	-10.6046	-29.0718	-13.1745
		ENSG00000248092.3	5.4544	4.5212	5.566	6.0778			ENSG00000173875.9	-5.503	-5.1282	-8.1527	-3.2031
		ENSG00000248175.1	1.9404	8.435	3.7984	4.6914			ENSG00000173992.4	-2.4851	-7.8997	-10.0094	-10.2545
		ENSG00000250337.1	4.3212	2.4895	3.5791	4.4754			ENSG00000174243.5	-4.1601	-6.997	-8.4969	-13.0757
		ENSG00000251562.3	3.8325	5.24	19.4762	8.4927			ENSG00000174306.17	-2.6855	-6.6481	-10.7775	-10.4329
		ENSG00000251791.1	4.4567	2.6232	2.0183	2.5275			ENSG00000174547.9	-2.622	-5.0706	-13.6817	-17.7385
		ENSG00000253304.1	2.6844	2.173	2.0741	4.7095			ENSG00000174564.8	-3.3343	-5.4166	-5.6955	-5.8234
		ENSG00000253475.1	2.8289	6.4905	5.7028	2.5051			ENSG00000174804.3	-4.7464	-9.5333	-13.3995	-12.8735
		ENSG00000254166.1	2.6029	2.2773	5.568	6.6459			ENSG00000175104.10	-3.1758	-5.6282	-6.5364	-4.1443
		ENSG00000254272.1	2.909	3.2756	3.1702	2.3842			ENSG00000175161.9	-4.9086	-5.3817	-5.8754	-2.2415
		ENSG00000254470.2	3.007	6.0082	6.7605	3.4529			ENSG00000175175.4	-2.0688	-2.6809	-12.7638	-2.6457
		ENSG00000254634.3	2.6026	2.7748	3.4429	2.3691			ENSG00000175287.14	-6.3018	-7.8265	-9.2058	-8.864
		ENSG00000255156.1	2.1999	8.9714	2.2384	2.9363			ENSG00000175390.8	-5.3564	-8.4237	-9.7625	-4.5195
		ENSG00000258429.1	3.4038	5.722	2.7153	3.3808			ENSG00000175536.6	-2.9697	-4.9862	-9.0833	-12.9153
		ENSG00000258486.2	23.2237	25.8907	61.0734	6.9773			ENSG00000175967.3	-3.7035	-3.5899	-7.7509	-3.2227
									ENSG00000176225.8	-6.6469	-23.3583	-33.1782	-11.9811
									ENSG00000176340.3	-5.1461	-12.0788	-10.9819	-12.9876
									ENSG00000176422.10	-2.7235	-3.3708	-12.469	-5.3324
									ENSG00000176476.4	-3.7913	-7.175	-20.651	-7.3622
									ENSG00000176635.13	-7.3442	-12.8298	-13.0247	-9.9362
									ENSG00000176714.9	-3.3434	-6.692	-7.1639	-4.9375
									ENSG00000176731.7	-2.4186	-11.729	-9.9215	-4.5907
									ENSG00000176894.5	-2.3485	-7.1843	-19.6735	-24.3518
									ENSG00000177138.11	-4.9592	-5.952	-22.2449	-17.5957
									ENSG00000178163.3	-5.2855	-7.7442	-3.5398	-2.8042
									ENSG00000178307.5	-3.5797	-4.9755	-3.2273	-2.539
									ENSG00000178385.9	-2.4299	-2.4585	-6.1155	-6.8152
									ENSG00000178607.11	-7.6969	-15.8512	-13.1728	-6.7972
									ENSG00000178662.11	-1.9933	-5.288	-6.8139	-3.1432
									ENSG00000178821.8	-4.9884	-5.8027	-13.5795	-12.4696
									ENSG00000178977.3	-2.3068	-3.8711	-4.894	-12.7845
									ENSG00000179399.9	-3.611	-4.8707	-18.4585	-6.7969
									ENSG00000179409.6	-2.3706	-6.0799	-7.697	-4.4816
									ENSG00000179520.6	-2.0503	-3.8823	-9.966	-2.477
									ENSG00000179639.6	-5.008	-2.8793	-4.7591	-2.6091
									ENSG00000179914.4	-2.3263	-3.6293	-5.5383	-5.9274
									ENSG00000179915.16	-9.7428	-9.8831	-11.2243	-3.0432
									ENSG00000180228.8	-2.6666	-2.599	-5.2562	-4.5657
									ENSG00000180346.2	-3.5088	-6.9054	-10.838	-15.0207
									ENSG00000180530.5	-3.1572	-6.3061	-6.3694	-3.5625
									ENSG00000180712.3	-2.7243	-3.92	-13.2673	-6.4029
									ENSG00000180938.5	-2.4964	-4.7062	-9.4432	-3.9368
									ENSG00000181631.6	-2.7474	-2.7474	-4.974	-4.1182
									ENSG00000181656.6	-4.5142	-7.4121	-15.8011	-12.865
									ENSG00000181722.11	-6.6658	-9.6206	-7.773	-14.3201
									ENSG00000181744.4	-7.0092	-8.3412	-7.4393	-2.7828
									ENSG00000181929.7	-2.1466	-4.1238	-6.2656	-6.7398
									ENSG00000182224.7	-6.9821	-6.5982	-10.8804	-7.6836
									ENSG00000182378.8	-3.2658	-4.0429	-4.9636	-8.1242
									ENSG00000182512.4	-3.936	-8.8448	-11.4058	-11.2925
									ENSG00000182552.10	-2.3314	-7.171	-6.1117	-5.0198
									ENSG00000182566.8	-3.3882	-10.5537	-20.6102	-60.8504
									ENSG00000182902.9	-3.8669	-5.4874	-4.7232	-9.4048
									ENSG00000183154.1	-2.5044	-4.1397	-14.4131	-15.2816
									ENSG00000183230.12	-3.0814	-13.5559	-25.7931	-22.4303
									ENSG00000183444.10	-3.2136	-3.7182	-2.497	-3.5368
									ENSG00000183628.8	-3.273	-12.4186	-11.1604	-14.2882
									ENSG00000184226.10	-3.5939	-3.1139	-5.2599	-7.2707
									ENSG00000184374.2	-2.3652	-12.476	-9.0904	-7.4388
									ENSG00000184564.8	-5.2021	-4.8467	-22.7404	-20.586
									ENSG00000184601.6	-3.9437	-4.2271	-7.7119	-2.5242
									ENSG00000184675.5	-5.6971	-8.7751	-14.4973	-32.1619
									ENSG00000184845.3	-3.9213	-6.6001	-15.5412	-4.7902
									ENSG00000185475.4	-3.6735	-7.4869	-7.1793	-8.4783
									ENSG00000185608.4	-1.962	-8.9778	-9.5325	-14.4985
									ENSG00000185652.7	-3.1429	-3.0992	-8.5395	-2.1229
									ENSG00000185664.10	-3.1636	-7.3311	-14.2676	-6.7446
									ENSG00000186153.12	-4.2111	-8.2501	-13.1497	-8.4046
									ENSG00000186205.8	-1.9854	-5.8392	-15.6848	-27.6666
									ENSG00000186314.7	-6.6357	-6.6599	-9.2494	-6.4197
									ENSG00000186458.4	-4.8425	-7.4351	-7.5874	-3.4376
									ENSG00000186642.11	-8.2298	-16.1102	-8.9668	-2.1289
									ENSG00000186743.2	-2.06	-3.1254	-4.6234	-2.9009
									ENSG00000187145.10	-4.3948	-9.947	-6.6021	-8.8689
									ENSG00000187187.9	-1.9276	-3.4872	-8.6479	-7.2593
									ENSG00000187193.8	-5.7274	-7.8786	-11.0912	-5.4038
									ENSG00000187742.10	-2.9528	-2.8134	-3.8261	-2.4779
									ENSG00000187762.5	-7.4543	-6.5586	-5.4421	-3.0619
									ENSG00000187840.4	-2.6696	-4.0341	-10.9275	-7.4629
									ENSG00000188177.9	-4.1038	-3.0095	-11.2875	-4.7874
									ENSG00000188517.10	-2.9642	-8.5625	-8.3735	-5.6832
									ENSG00000188850.9	-4.3527	-9.8317	-7.2139	-4.261
									ENSG00000188938.11	-3.4237	-9.8089	-8.5801	-8.1357
									ENSG00000189046.6	-6.7177	-17.9353	-26.9374	-21.0049
									ENSG00000189108.8	-3.3654	-9.4877	-10.8704	-7.9255
									ENSG00000189180.11	-1.9333	-3.6957	-9.7377	-4.6198
									ENSG00000189367.10	-8.6467	-3.948	-1.8476	-2.4509
									ENSG00000189369.7	-3.06	-8.6728	-8.5236	-6.4306
									ENSG00000189419.5	-2.4325	-4.0784	-3.5062	-9.0028
									ENSG00000196357.7	-2.8012	-3.7524	-3.8097	-2.9238
									ENSG00000196372.8	-11.396	-6.0983	-14.8326	-6.8248
									ENSG00000196409.7	-2.5707	-7.8597	-8.0961	-6.546
									ENSG00000196455.3	-2.3316	-10.8032	-16.706	-17.6261
									ENSG00000196553.9	-7.5688	-7.7372	-15.7948	-11.5056
									ENSG00000196704.7	-3.52	-10.0738	-10.4542	-9.0512
									ENSG00000196730.8	-2.9513	-6.3357	-9.6248	-7.4609
									ENSG00000196781.9	-2.9796	-3.5901	-4.4447	-3.0696
									ENSG00000197013.5	-2.5533	-5.0042	-10.0496	-9.3163
									ENSG00000197579.3	-2.63	-6.0746	-9.5332	-9.2718
									ENSG00000197776.3	-2.6674	-4.8108	-7.4802	-9.1752
									ENSG00000197935.6	-4.0825	-2.3425	-2.2429	-2.8269
									ENSG00000197991.10	-3.6228	-9.0208	-8.11	-8.2468
									ENSG00000198218.6	-3.122	-4.5636	-2.7159	-2.8327
									ENSG00000198417.5	-4.7763	-8.5395	-18.7013	-8.0889
									ENSG00000198464.9	-2.2322	-6.1199	-3.2051	-2.6017
									ENSG00000198546.10	-4.2052	-10.1131	-15.1874	-18.3167
									ENSG00000198585.7	-4.4541	-8.4403	-22.4908	-9.0279
									ENSG00000198650.6	-2.1746	-3.0486	-6.701	-4.0083
									ENSG00000198673.6	-3.0852	-4.5094	-7.7837	-2.7659
									ENSG00000198690.5	-3.3741	-5.9933	-10.6928	-17.5043
									ENSG00000198732.6	-4.5137	-8.2089	-14.5998	-11.6113
									ENSG00000198783.4	-3.7205	-3.2243	-3.4803	-5.8775
									ENSG00000198894.3	-1.934	-5.0698	-12.9259	-4.9217
									ENSG00000198945.3	-2.9843	-3.515	-8.8236	-4.3208
									ENSG00000198964.9	-2.1222	-7.7879	-7.2533	-4.328
									ENSG00000199065.2	-5.2695	-5.3804	-9.8557	-19.5469
									ENSG00000200090.1	-2.1822	-2.4325	-2.5581	-3.488
									ENSG00000200605.1	-2.5688	-2.8118	-4.9287	-7.5809
									ENSG00000201098.1	-4.8153	-24.2886	-9.7042	-7.6711
									ENSG00000201737.1	-3.8648	-2.6086	-7.9137	-5.0641
									ENSG00000201796.1	-3.3876	-6.8937	-8.6211	-2.8084
									ENSG00000202512.1	-23.6964	-12.9471	-12.0418	-23.7909
									ENSG00000203684.5	-2.3681	-3.3151	-4.0445	-2.7669
									ENSG00000203709.5	-2.6482	-4.4406	-7.6804	-6.9382
									ENSG00000203739.3	-3.6855	-3.1724	-3.7153	-2.5787
									ENSG00000203843.3	-7.0765	-8.9879	-9.8887	-8.8001
									ENSG00000203886.4	-6.4211	-6.6611	-11.3813	-8.5799
									ENSG00000203900.2	-2.7113	-2.5143	-8.9918	-3.8079
									ENSG00000203972.5	-2.4282	-9.3956	-14.5247	-3.3709
									ENSG00000204120.10	-6.1768	-5.1675	-4.6745	-2.7313
									ENSG00000204178.5	-3.3968	-4.5575	-13.6472	-6.8858
									ENSG00000204219.5	-3.3088	-9.6628	-16.9744	-14.464
									ENSG00000204308.6	-4.4497	-4.7364	-18.719	-9.3569
									ENSG00000204356.7	-6.8637	-6.7781	-10.7092	-7.9892
									ENSG00000204611.2	-2.4906	-5.0476	-7.0632	-4.4875
									ENSG00000204653.5	-3.1548	-3.1417	-14.6085	-15.1248
									ENSG00000204710.2	-2.7389	-2.5902	-9.9947	-3.7619
									ENSG00000204920.6	-2.9144	-3.3567	-4.9514	-3.6473
									ENSG00000205358.3	-2.4605	-15.9461	-15.4693	-18.2664
									ENSG00000205360.5	-6.0094	-8.6602	-7.049	-5.8672
									ENSG00000205726.9	-3.4361	-13.7916	-3.8201	-2.582
									ENSG00000205754.6	-2.7938	-3.7654	-6.0787	-6.9914
									ENSG00000206052.6	-4.5102	-12.0981	-15.8814	-9.8474
									ENSG00000206077.6	-2.9512	-8.9336	-7.9624	-2.9116
									ENSG00000206803.1	-3.1389	-2.9741	-6.1412	-14.0344
									ENSG00000207251.1	-9.7055	-9.5665	-11.2154	-7.2811
									ENSG00000207327.1	-11.0236	-10.0954	-10.3983	-6.3321
									ENSG00000207454.1	-3.3347	-5.3064	-9.867	-4.2492
									ENSG00000207652.1	-2.3536	-6.2622	-2.4385	-8.6626
									ENSG00000210176.1	-9.5091	-5.604	-10.8118	-11.5382
									ENSG00000211450.5	-3.7642	-6.7305	-6.9087	-10.577
									ENSG00000211899.3	-8.2782	-3.6031	-5.2674	-3.3057
									ENSG00000212293.1	-3.6991	-2.7433	-7.5963	-8.5378
									ENSG00000212482.1	-5.5557	-5.486	-5.1124	-8.0209
									ENSG00000212916.3	-2.472	-3.4024	-4.1421	-5.5418
									ENSG00000213062.3	-18.3261	-16.9642	-19.725	-16.0048
									ENSG00000213073.4	-2.6809	-3.6436	-4.6281	-3.7869
									ENSG00000213368.3	-3.9448	-5.6656	-4.8689	-3.5828
									ENSG00000213398.3	-2.0607	-6.6947	-19.7908	-23.9258
									ENSG00000213494.5	-5.2395	-7.7479	-3.2981	-6.7262
									ENSG00000213516.5	-5.0475	-5.5385	-4.2032	-4.8597
									ENSG00000213533.7	-2.6836	-3.2259	-9.8339	-6.8303
									ENSG00000213659.4	-6.8636	-3.0227	-5.0336	-4.9048
									ENSG00000213762.6	-2.8388	-7.3652	-8.0536	-3.2193
									ENSG00000213853.5	-6.2585	-8.9047	-14.7014	-10.1271
									ENSG00000213866.3	-2.6775	-5.3552	-9.8009	-5.1625
									ENSG00000213995.7	-2.5884	-5.7258	-3.7237	-12.1049
									ENSG00000213996.8	-2.461	-5.925	-9.4362	-11.9147
									ENSG00000214013.5	-12.0682	-6.4394	-10.7176	-7.5549
									ENSG00000214252.4	-4.5794	-3.7785	-6.5256	-9.7688
									ENSG00000214313.4	-8.4121	-4.5817	-12.0029	-15.6062
									ENSG00000214401.4	-3.1075	-2.6072	-6.387	-2.2575
									ENSG00000214654.5	-2.2462	-2.5481	-3.8249	-7.5871
									ENSG00000215018.5	-2.5733	-14.5149	-23.3594	-4.3467
									ENSG00000215124.2	-3.0915	-10.0672	-15.4316	-16.0029
									ENSG00000215186.6	-2.1526	-3.1659	-7.7306	-15.2002
									ENSG00000215217.2	-9.9052	-8.3927	-7.5877	-3.3554
									ENSG00000216895.4	-3.3937	-3.8689	-6.3783	-7.0782
									ENSG00000218265.1	-3.1807	-3.9182	-4.4638	-6.7226
									ENSG00000218757.1	-10.281	-10.546	-9.7804	-3.6253
									ENSG00000219607.2	-5.0471	-2.3913	-5.357	-3.8625
									ENSG00000220600.2	-8.2992	-9.9161	-11.5894	-13.6395
									ENSG00000221042.1	-4.2146	-3.5774	-4.3349	-2.6203
									ENSG00000221552.1	-3.2637	-7.7201	-6.7039	-7.4015
									ENSG00000221817.5	-5.1235	-4.1382	-8.0916	-2.9409
									ENSG00000221983.3	-2.7297	-7.6851	-5.7125	-9.6497
									ENSG00000221988.8	-2.2459	-3.1816	-4.2781	-4.7021
									ENSG00000222040.3	-4.3079	-4.713	-7.9268	-10.1131
									ENSG00000222650.1	-2.6132	-8.5382	-5.6832	-9.9303
									ENSG00000223117.1	-2.7252	-4.3218	-8.0862	-12.6106
									ENSG00000223231.1	-2.7378	-4.0681	-16.7067	-18.9974
									ENSG00000223638.3	-2.2001	-3.3161	-10.9887	-8.8936
									ENSG00000223749.3	-5.6943	-3.5965	-3.9783	-6.6725
									ENSG00000223779.4	-4.0717	-7.8169	-12.0443	-5.005
									ENSG00000223825.4	-3.4688	-5.4773	-8.7021	-2.5287
									ENSG00000223891.1	-2.4865	-4.16	-6.9941	-6.9368
									ENSG00000223956.1	-7.147	-14.7474	-36.904	-24.1237
									ENSG00000223969.1	-3.6883	-8.2108	-5.2499	-7.7922
									ENSG00000223977.1	-2.0086	-11.0636	-3.8105	-8.3463
									ENSG00000224032.2	-2.3132	-5.6493	-10.5576	-7.1592
									ENSG00000224037.2	-7.9522	-4.0716	-16.4718	-5.8314
									ENSG00000224058.2	-3.3503	-4.3422	-4.4033	-4.5874
									ENSG00000224069.1	-2.3823	-3.6771	-3.9883	-3.9296
									ENSG00000224272.2	-3.4761	-5.9605	-6.7957	-2.6155
									ENSG00000224699.4	-3.3684	-3.8177	-4.8091	-5.1324
									ENSG00000225423.1	-11.8719	-10.4612	-15.8358	-18.58
									ENSG00000225470.2	-3.6404	-2.7923	-2.5839	-4.3351
									ENSG00000225522.2	-2.1117	-6.2529	-11.7467	-10.8144
									ENSG00000225726.1	-3.0528	-2.2878	-4.4531	-2.9901
									ENSG00000225791.2	-2.6346	-6.742	-20.8221	-15.9159
									ENSG00000226015.2	-5.3629	-6.5879	-12.149	-7.5034
									ENSG00000226084.4	-7.5751	-19.4453	-28.5687	-24.6595
									ENSG00000226243.1	-5.503	-9.3771	-10.3737	-12.0401
									ENSG00000226254.1	-1.9094	-2.8948	-2.5521	-3.6331
									ENSG00000226306.6	-3.2685	-3.7457	-5.5185	-4.6178
									ENSG00000226380.3	-10.8234	-7.7211	-7.3294	-2.7131
									ENSG00000226580.1	-5.5365	-6.895	-6.2838	-21.543
									ENSG00000226733.1	-2.8402	-7.5565	-19.932	-16.1886
									ENSG00000226742.3	-5.918	-8.6223	-20.7181	-13.7373
									ENSG00000226798.1	-7.9978	-7.5897	-11.0232	-7.8232
									ENSG00000226853.2	-3.0453	-7.2754	-7.9275	-13.0298
									ENSG00000226950.2	-3.8242	-6.7619	-7.4564	-5.1337
									ENSG00000227117.2	-6.9524	-8.3842	-9.003	-10.7061
									ENSG00000227201.2	-5.4316	-9.4464	-9.3441	-7.511
									ENSG00000227242.2	-3.971	-11.0311	-28.4881	-18.8615
									ENSG00000227591.1	-2.8506	-7.8967	-9.5385	-9.6458
									ENSG00000228107.1	-7.9549	-5.6803	-7.6883	-12.0728
									ENSG00000228201.1	-2.0226	-2.3382	-5.4134	-15.311
									ENSG00000228445.1	-4.3854	-4.7745	-12.4411	-9.8179
									ENSG00000228486.5	-2.4935	-2.1428	-2.7824	-2.3473
									ENSG00000228506.1	-3.7312	-4.4468	-4.0677	-7.4076
									ENSG00000228638.1	-2.9	-2.2293	-2.2448	-4.2687
									ENSG00000228683.1	-11.3561	-6.2143	-9.0295	-8.6821
									ENSG00000228950.1	-6.2394	-14.7177	-9.5132	-2.1873
									ENSG00000229388.1	-3.3594	-5.4952	-4.164	-4.1814
									ENSG00000229521.2	-3.3329	-5.1426	-3.5757	-6.2566
									ENSG00000229537.1	-14.234	-14.3068	-14.0549	-3.7097
									ENSG00000229668.1	-4.8294	-2.245	-6.2285	-3.1748
									ENSG00000229754.1	-3.274	-4.1176	-2.8619	-16.1627
									ENSG00000229792.1	-16.1218	-8.0078	-7.9847	-19.9228
									ENSG00000229808.1	-3.8013	-5.2792	-5.1762	-2.6817
									ENSG00000229886.1	-3.216	-3.3043	-5.3239	-4.6288
									ENSG00000229896.2	-3.8925	-4.6167	-15.1799	-14.5446
									ENSG00000230055.2	-5.5799	-6.1495	-16.2488	-18.9112
									ENSG00000230058.1	-6.7335	-5.698	-5.9958	-4.147
									ENSG00000230300.1	-3.8836	-3.5122	-7.6918	-2.5379
									ENSG00000230371.1	-3.2801	-3.8165	-4.1328	-8.8993
									ENSG00000230437.1	-4.3077	-8.5469	-4.6175	-2.7634
									ENSG00000230457.3	-2.6883	-6.0058	-8.1425	-6.268
									ENSG00000230479.1	-10.3191	-11.7875	-18.5882	-27.1631
									ENSG00000230513.1	-5.8572	-7.7998	-10.4519	-10.0037
									ENSG00000230613.1	-2.4866	-9.3199	-16.2462	-15.567
									ENSG00000230833.1	-4.3652	-3.8863	-3.6957	-3.606
									ENSG00000231047.1	-4.697	-6.2066	-9.6667	-7.5583
									ENSG00000231113.2	-5.19	-7.3382	-10.7361	-4.2
									ENSG00000231294.1	-3.2647	-3.484	-6.7565	-4.0379
									ENSG00000231611.1	-2.8849	-2.7976	-2.417	-7.664
									ENSG00000231768.1	-6.3347	-5.452	-6.203	-2.2096
									ENSG00000231856.1	-2.2916	-2.7636	-10.0838	-10.1434
									ENSG00000231948.2	-5.3374	-2.7556	-3.1789	-3.8406
									ENSG00000231969.1	-3.271	-6.0996	-6.0586	-4.6867
									ENSG00000231992.1	-7.6769	-7.4105	-10.1656	-11.0754
									ENSG00000232131.1	-2.7257	-5.242	-13.9862	-12.2429
									ENSG00000232283.1	-6.1357	-6.7121	-13.0264	-9.7654
									ENSG00000232637.3	-3.5475	-6.2216	-6.0511	-7.6491
									ENSG00000232667.5	-3.5201	-9.8875	-24.5034	-28.6465
									ENSG00000232780.1	-8.8027	-8.3923	-12.6674	-8.0339
									ENSG00000233131.1	-3.4054	-3.0389	-1.8329	-3.2905
									ENSG00000233255.1	-4.9018	-7.9384	-18.1423	-6.5022
									ENSG00000233554.1	-3.8907	-7.1426	-23.2187	-16.6305
									ENSG00000233674.2	-3.7972	-2.8013	-2.8822	-7.6253
									ENSG00000234066.1	-3.7394	-4.8238	-5.1893	-2.2663
									ENSG00000234181.1	-7.6073	-4.7973	-8.6217	-2.4183
									ENSG00000234268.1	-2.2017	-2.5365	-4.3113	-5.2304
									ENSG00000234367.1	-5.9121	-5.9584	-7.7057	-5.3323
									ENSG00000234502.2	-7.1924	-5.1755	-14.211	-10.812
									ENSG00000234604.2	-9.8401	-6.58	-12.2569	-3.2618
									ENSG00000234664.1	-4.5575	-8.4214	-9.9684	-7.4348
									ENSG00000234840.1	-3.7762	-4.1051	-6.3684	-5.2044
									ENSG00000235092.1	-3.6512	-4.2734	-5.2782	-4.9134
									ENSG00000235248.2	-3.2399	-2.2554	-8.6447	-14.0337
									ENSG00000235363.1	-3.6051	-8.6166	-5.3833	-6.1774
									ENSG00000235501.1	-6.0673	-10.0849	-8.7274	-12.3833
									ENSG00000235527.2	-2.8007	-5.0012	-11.2041	-3.8749
									ENSG00000235532.1	-2.2993	-7.1823	-17.1107	-4.91
									ENSG00000235595.1	-6.0649	-6.8318	-13.8867	-7.2288
									ENSG00000235669.1	-8.8823	-10.0813	-10.7173	-9.7633
									ENSG00000235954.2	-2.8881	-3.6098	-4.3982	-6.0144
									ENSG00000236077.2	-6.3446	-5.3418	-6.1476	-2.629
									ENSG00000236283.1	-2.1162	-3.3967	-18.7835	-10.6002
									ENSG00000236378.1	-6.2102	-14.0704	-10.8917	-7.5159
									ENSG00000236548.1	-2.7259	-7.8454	-7.2858	-4.662
									ENSG00000236618.2	-4.4188	-6.597	-14.6999	-15.9211
									ENSG00000236810.1	-2.9223	-8.7287	-15.609	-6.7465
									ENSG00000236859.2	-3.2625	-3.892	-7.5826	-3.5495
									ENSG00000237065.2	-19.3417	-20.4041	-19.8756	-23.2955
									ENSG00000237076.1	-2.5844	-8.4823	-15.463	-14.4964
									ENSG00000237160.2	-3.4026	-5.4108	-10.0346	-18.6624
									ENSG00000237180.1	-3.7352	-2.0778	-2.9205	-3.1209
									ENSG00000237224.2	-2.4347	-12.8913	-18.8369	-5.7315
									ENSG00000237310.1	-2.412	-3.5006	-8.1946	-10.571
									ENSG00000237327.1	-14.4432	-14.004	-5.9222	-4.0229
									ENSG00000237494.1	-2.7741	-6.0364	-6.5565	-15.4739
									ENSG00000237749.3	-3.013	-7.8849	-8.6757	-4.2691
									ENSG00000237907.1	-4.1248	-2.8959	-16.6637	-6.7441
									ENSG00000238099.1	-2.4901	-3.9732	-19.1521	-10.8612
									ENSG00000238286.1	-4.9385	-4.0138	-9.6042	-6.3963
									ENSG00000239116.1	-7.9415	-9.4963	-11.5104	-6.9584
									ENSG00000239170.1	-3.2047	-5.7015	-8.1987	-8.0162
									ENSG00000239282.3	-3.7271	-3.9417	-4.0364	-2.7273
									ENSG00000239794.2	-4.3049	-5.0974	-6.1738	-2.9002
									ENSG00000240005.1	-6.2092	-6.6923	-7.6835	-3.6501
									ENSG00000240038.2	-4.4962	-4.1076	-6.8435	-12.2937
									ENSG00000240875.1	-2.7022	-6.0533	-8.3057	-10.9112
									ENSG00000240891.2	-2.8741	-4.5722	-5.017	-3.6825
									ENSG00000240915.2	-2.1878	-4.6863	-11.4856	-16.297
									ENSG00000240972.1	-7.3862	-13.3289	-17.3751	-19.9996
									ENSG00000241187.1	-2.3379	-2.8896	-8.3378	-13.1684
									ENSG00000241544.1	-6.9858	-10.0254	-10.8883	-6.7425
									ENSG00000241635.3	-3.3101	-3.8855	-11.7525	-18.8711
									ENSG00000241935.4	-4.647	-3.5009	-15.1021	-16.814
									ENSG00000242048.2	-2.966	-5.6351	-5.4828	-2.4877
									ENSG00000242220.2	-2.0136	-6.0478	-10.7379	-14.3434
									ENSG00000242747.1	-2.834	-4.2097	-3.8355	-2.2078
									ENSG00000243069.3	-4.2815	-3.6108	-7.4896	-2.547
									ENSG00000243649.4	-5.0114	-9.8738	-14.6773	-13.4361
									ENSG00000243831.1	-3.0813	-6.0258	-8.0794	-13.2592
									ENSG00000243926.1	-1.9718	-2.5599	-7.2309	-4.5373
									ENSG00000244018.1	-5.4156	-3.7314	-4.3454	-2.2049
									ENSG00000244128.1	-4.7858	-7.6757	-15.2979	-5.135
									ENSG00000245149.3	-3.0019	-3.2479	-2.6885	-3.2864
									ENSG00000246082.2	-2.2783	-7.0047	-11.6722	-7.9344
									ENSG00000246090.2	-5.3303	-5.1318	-7.8115	-3.2124
									ENSG00000246523.3	-2.4647	-2.7358	-10.9864	-10.7338
									ENSG00000246560.2	-3.5331	-4.3657	-4.1845	-5.0983
									ENSG00000246985.3	-5.0737	-3.7575	-4.2778	-3.3361
									ENSG00000247011.2	-3.7101	-5.1528	-8.7505	-9.3579
									ENSG00000247746.4	-4.1687	-4.3525	-3.2683	-3.6353
									ENSG00000247796.2	-5.495	-9.9415	-12.4113	-11.8025
									ENSG00000248050.1	-7.1405	-9.2477	-7.8931	-11.0175
									ENSG00000248114.1	-4.0803	-3.9366	-10.5558	-17.4859
									ENSG00000248275.1	-3.378	-5.2493	-7.7053	-2.5694
									ENSG00000248487.4	-2.2046	-3.185	-6.5292	-6.2815
									ENSG00000248493.1	-5.937	-6.866	-7.8749	-8.9778
									ENSG00000248705.1	-4.0794	-4.3804	-8.3633	-18.2161
									ENSG00000248810.1	-2.7976	-6.6816	-6.5907	-8.3143
									ENSG00000248851.1	-3.5516	-6.2068	-6.5478	-2.3381
									ENSG00000248866.1	-2.8256	-3.2226	-3.8812	-2.7694
									ENSG00000249173.1	-2.6894	-4.2927	-11.4921	-7.0425
									ENSG00000249249.1	-4.4996	-3.3426	-9.8866	-6.7899
									ENSG00000249252.1	-4.2499	-2.3517	-6.3945	-2.2011
									ENSG00000249274.1	-8.2962	-7.2776	-14.7906	-13.8004
									ENSG00000249363.1	-2.9646	-3.3118	-6.389	-4.6805
									ENSG00000249684.1	-4.4859	-5.037	-12.2404	-2.7643
									ENSG00000249846.2	-2.4202	-3.1275	-8.2669	-5.0806
									ENSG00000249868.4	-3.9282	-13.4617	-11.8487	-5.6986
									ENSG00000250056.1	-5.6358	-4.887	-21.6161	-17.0038
									ENSG00000250101.1	-2.8023	-7.3726	-5.4464	-5.6878
									ENSG00000250144.1	-2.6891	-6.9731	-10.7536	-2.545
									ENSG00000250257.1	-5.0123	-2.3722	-6.2352	-2.486
									ENSG00000250293.1	-2.2705	-2.3546	-5.6891	-2.7268
									ENSG00000250357.1	-3.0669	-10.0781	-8.9559	-9.3124
									ENSG00000250362.1	-4.9916	-5.0562	-7.6437	-9.6712
									ENSG00000250569.1	-2.8804	-2.7747	-6.0633	-3.6094
									ENSG00000250802.2	-3.4358	-9.1929	-8.0361	-5.5506
									ENSG00000251139.1	-11.9008	-15.0819	-17.6374	-19.9384
									ENSG00000251218.1	-4.2645	-6.8203	-13.2694	-2.6703
									ENSG00000251580.1	-3.5938	-5.0493	-10.655	-12.022
									ENSG00000251603.1	-3.5573	-3.8194	-4.4892	-2.3289
									ENSG00000251934.1	-2.7139	-4.6888	-2.7267	-4.3092
									ENSG00000252130.1	-2.9556	-3.6187	-7.7339	-9.0903
									ENSG00000252343.1	-4.6029	-4.7622	-5.6051	-3.5202
									ENSG00000252559.1	-7.5743	-5.7519	-5.0543	-5.1931
									ENSG00000252965.1	-5.4643	-9.8013	-6.049	-8.4267
									ENSG00000253006.1	-6.8853	-6.5112	-6.2771	-10.0524
									ENSG00000253114.2	-6.145	-6.1868	-6.8165	-5.5984
									ENSG00000253142.1	-2.7791	-4.2714	-2.2618	-4.6763
									ENSG00000253147.1	-4.0441	-3.8556	-12.6275	-11.491
									ENSG00000253357.1	-2.021	-2.8078	-8.5783	-8.4972
									ENSG00000253433.1	-2.703	-7.9171	-8.4177	-7.3732
									ENSG00000253948.1	-2.4523	-3.2334	-2.2767	-2.9237
									ENSG00000254028.1	-3.1841	-3.8955	-13.2618	-9.9938
									ENSG00000254042.1	-5.5875	-13.8092	-31.1931	-9.8269
									ENSG00000254192.1	-2.7464	-4.5007	-18.5306	-13.0233
									ENSG00000254392.1	-2.1078	-2.5191	-6.2242	-5.9892
									ENSG00000254473.1	-5.4413	-8.0425	-19.3507	-13.6957
									ENSG00000254531.1	-4.5054	-3.1113	-6.7179	-4.6779
									ENSG00000254682.1	-2.7194	-11.4101	-9.8006	-5.2026
									ENSG00000255396.2	-3.2764	-4.8862	-2.8249	-3.6132
									ENSG00000255471.1	-2.2967	-6.684	-10.4415	-7.5886
									ENSG00000256073.2	-3.0957	-5.1775	-11.5336	-12.3562
									ENSG00000258202.1	-5.6298	-8.1664	-8.8365	-7.4853
									ENSG00000258311.1	-3.263	-3.9487	-4.5719	-12.8243
									ENSG00000258460.1	-6.0257	-7.669	-7.59	-13.4464
									ENSG00000258461.1	-6.2697	-7.2227	-11.1496	-8.8088
									ENSG00000258498.2	-4.0259	-4.2853	-6.6235	-4.6082
									ENSG00000258694.1	-4.5662	-11.9464	-8.0644	-3.0774
									ENSG00000258796.1	-7.6257	-7.0638	-6.7142	-4.8225
									ENSG00000258819.1	-7.5323	-7.5725	-8.5762	-5.2235
									ENSG00000258872.2	-3.2225	-2.5126	-2.1416	-7.4017
