# Supplementary material for: Alcohol Use Disorder Causes Profound Global Changes in Gene Expression and Splicing in the Liver
Source: Research Square preprint supplement (doi:10.21203/rs.3.rs-6507570/v1), 2025-05-08
Supplement: Supplementary file 9 [file e913b043450efe70031798a2.xlsx]

## Sheet: Sheet1
Supplementary Table 3
Gene Ontology of Overlapping Downregulated Transcriptome in eASH and exAH
	GO biological process complete	Fold Enrichment	P-value
	DNA damage response, signal transduction by p53 class mediator resulting in cell cycle arrest (GO:0006977)	6.52	0.000754
	Mitotic spindle organization (GO:0007052)	5.25	0.0083
	Mitotic sister chromatid segregation (GO:0000070)	4.8	0.000488
	Regulation of chromosome segregation (GO:0051983)	4.24	0.0111
	Regulation of extrinsic apoptotic signaling pathway (GO:2001236)	3.35	0.0444
