# Supplementary material for: Alcohol Use Disorder Causes Profound Global Changes in Gene Expression and Splicing in the Liver
Source: Research Square preprint supplement (doi:10.21203/rs.3.rs-6507570/v1), 2025-05-08
Supplement: Supplementary file 10 [file f92f143e868e4e1695509f58.docx]

­
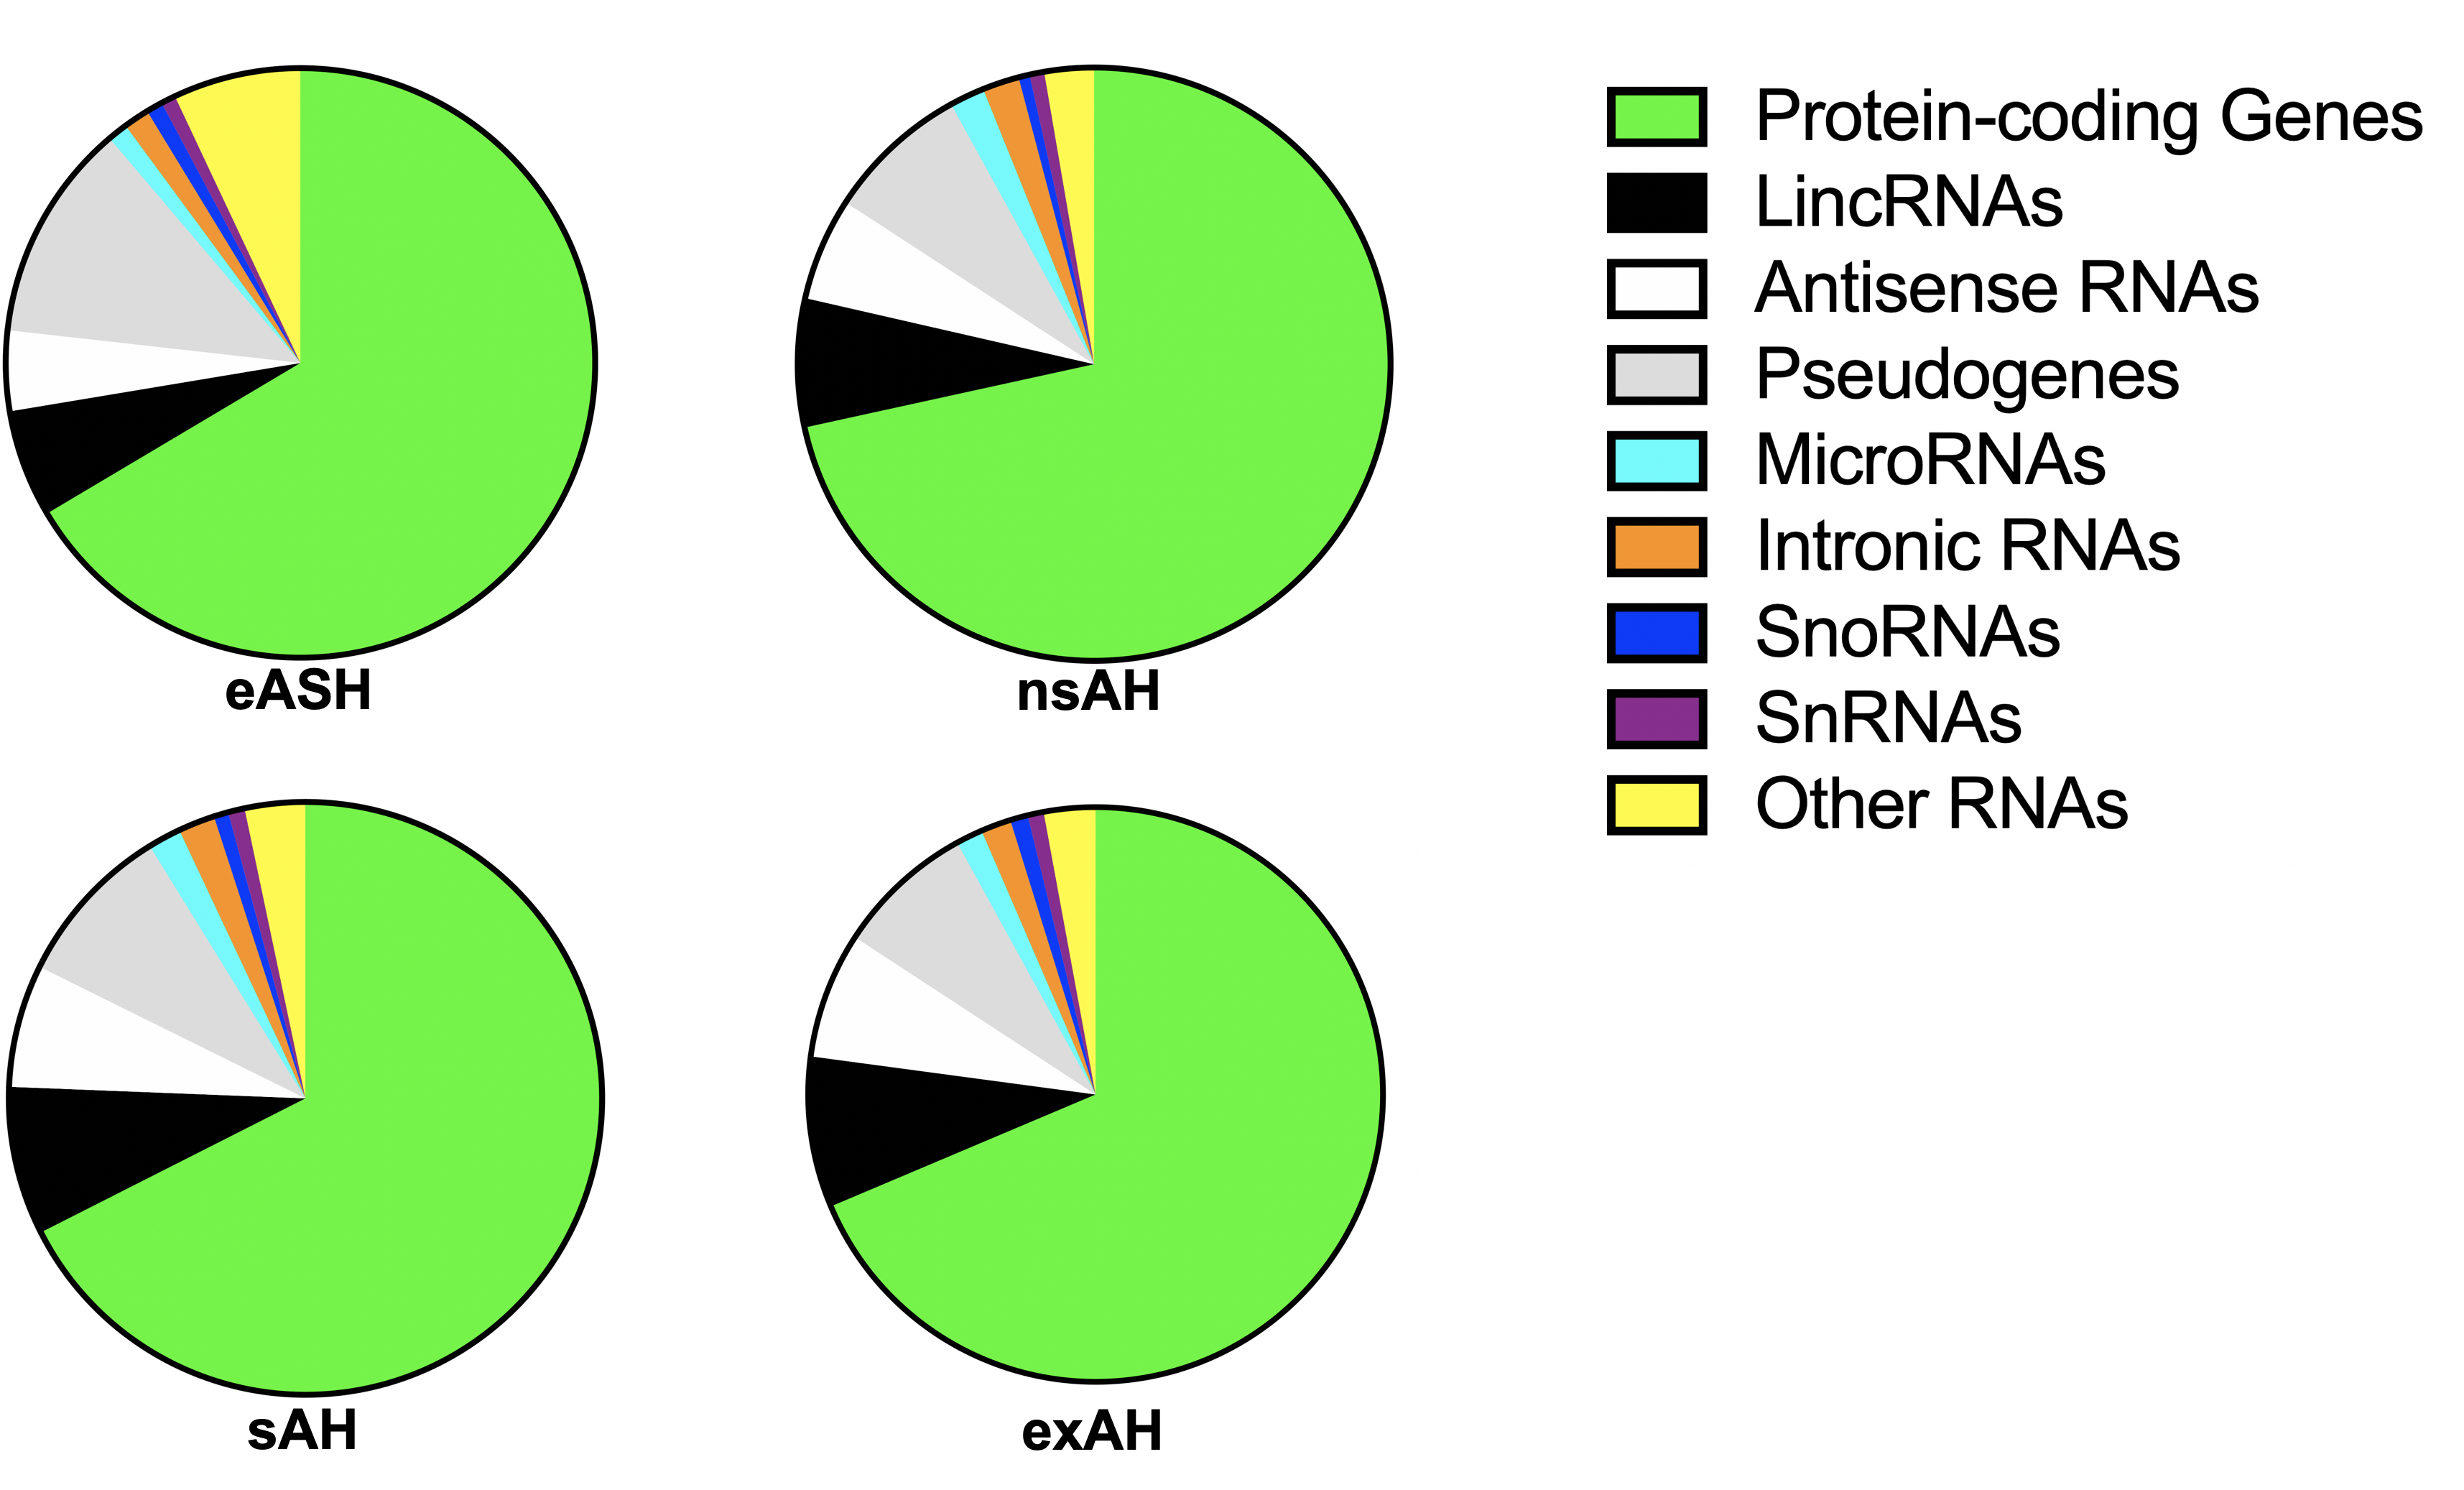


**Supplementary Figure 1.** Distribution of altered transcripts in AUD. eASH – early alcoholic steatohepatitis, nsAH – non-severe alcoholic hepatitis, sAH – severe alcoholic hepatitis, exAH – explants from patients who underwent hepatic transplantation due to liver failure.

**Supplementary Figure 2.** Blood alcohol concentrations in rats exposed to alcohol vapor (N=12 in each group). * – P < 0.05.

**
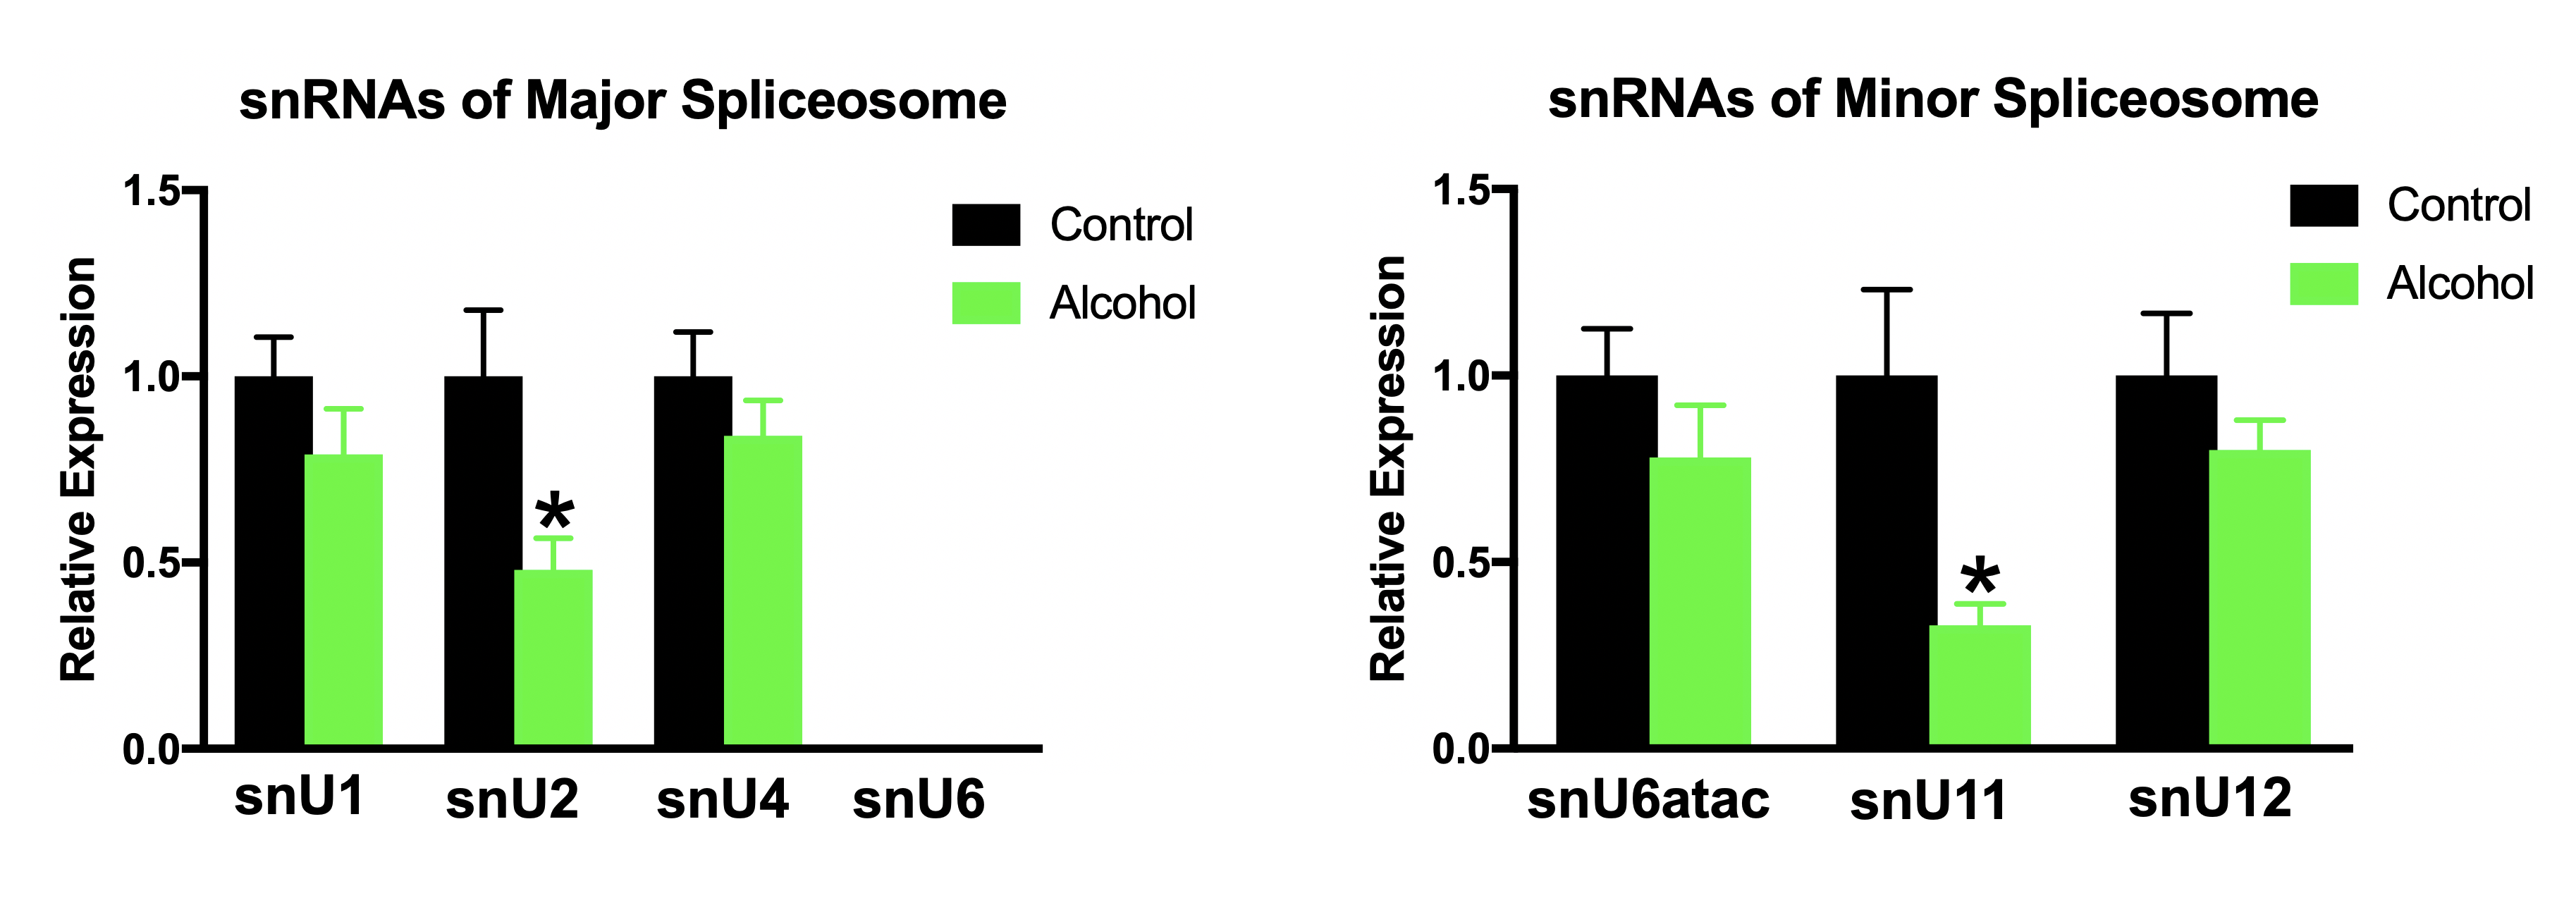
**

**Supplementary Figure 3.** Expression of snRNAs in the lung of rats exposed to alcohol vapor. * – P < 0.05.


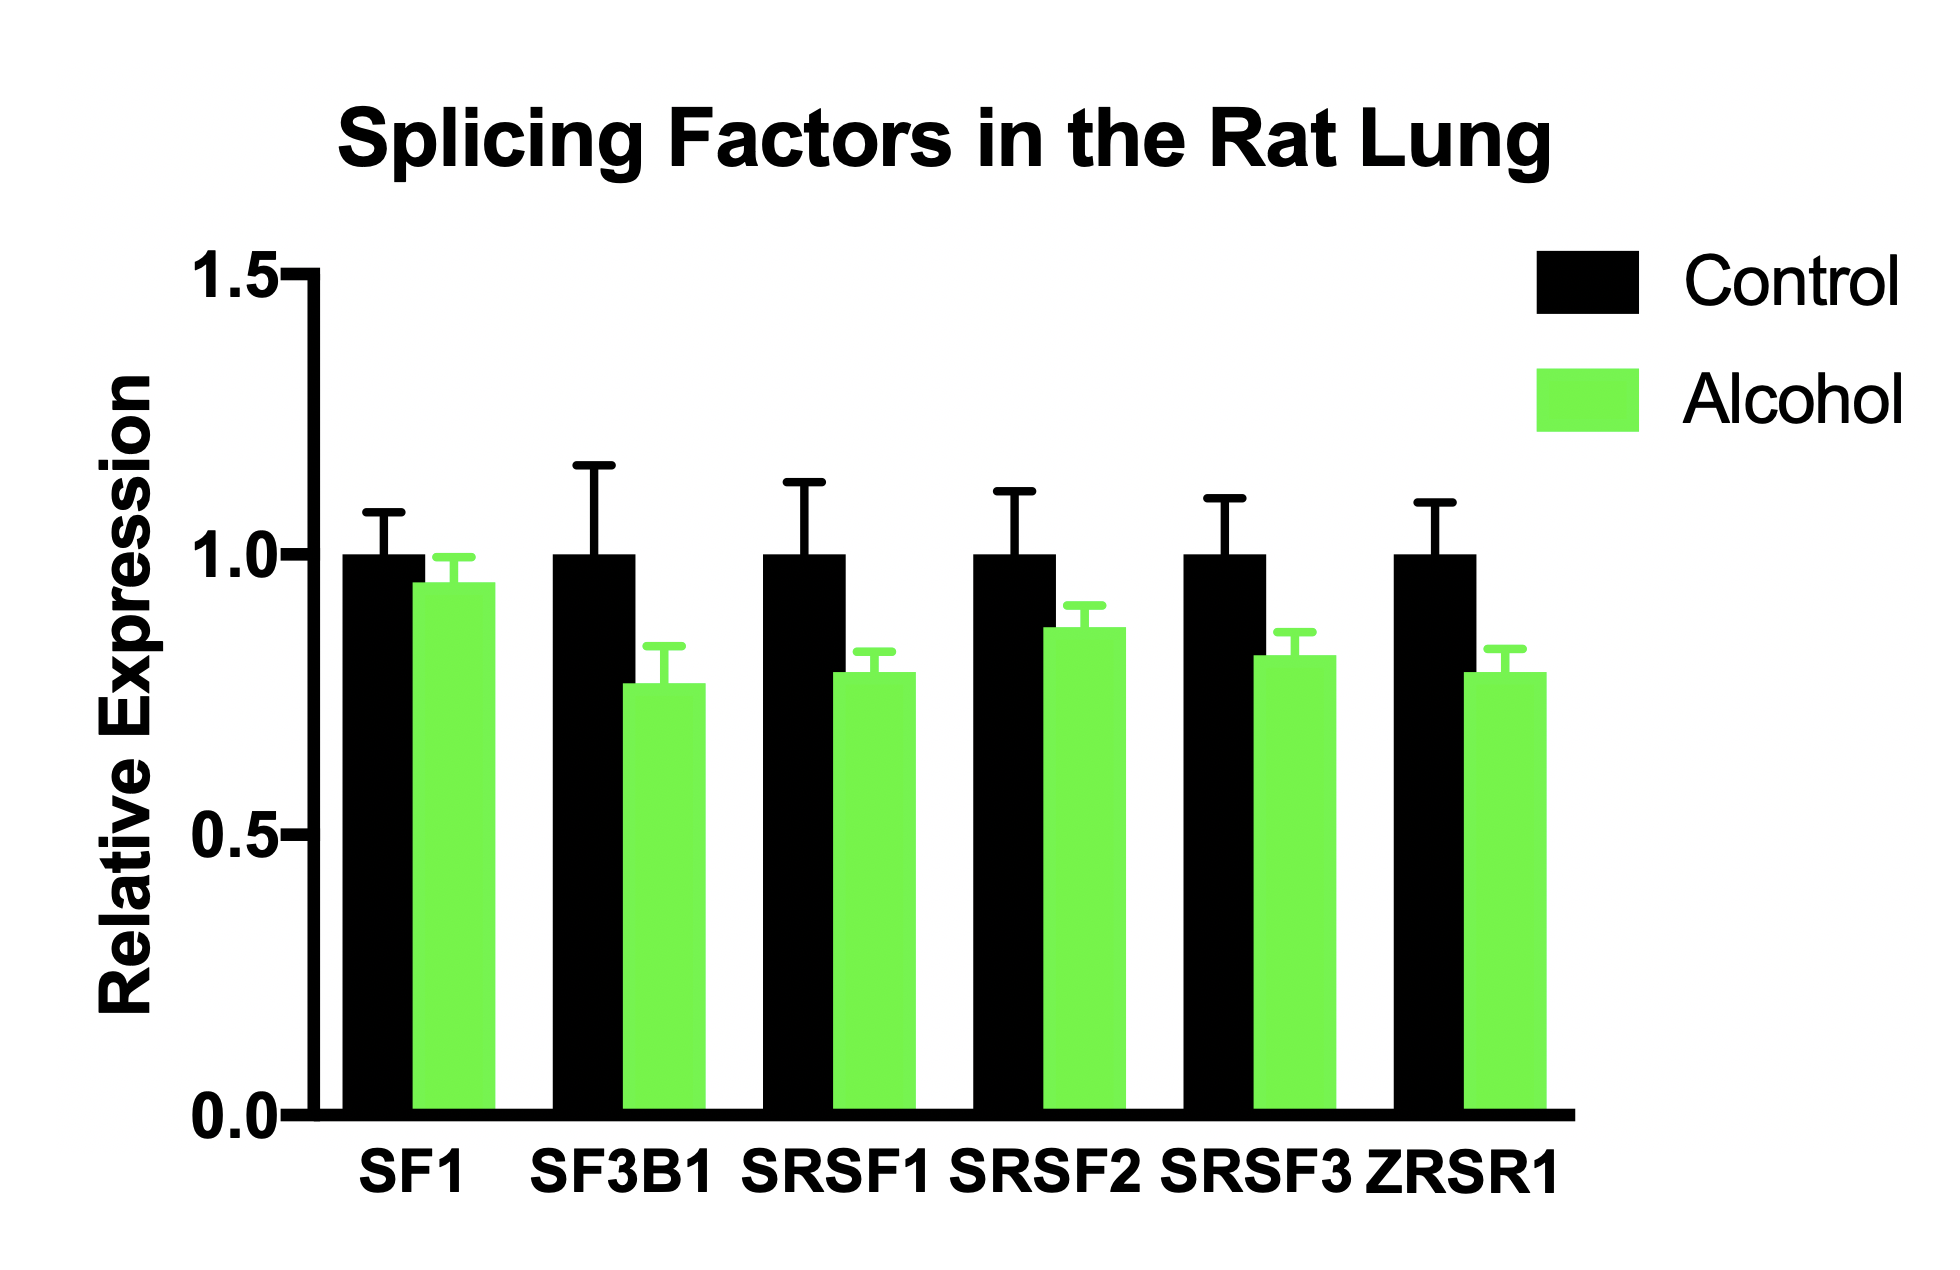


**Supplementary Figure 4.** Expression of cancer-related splicing-factors in the lung of rats.

**
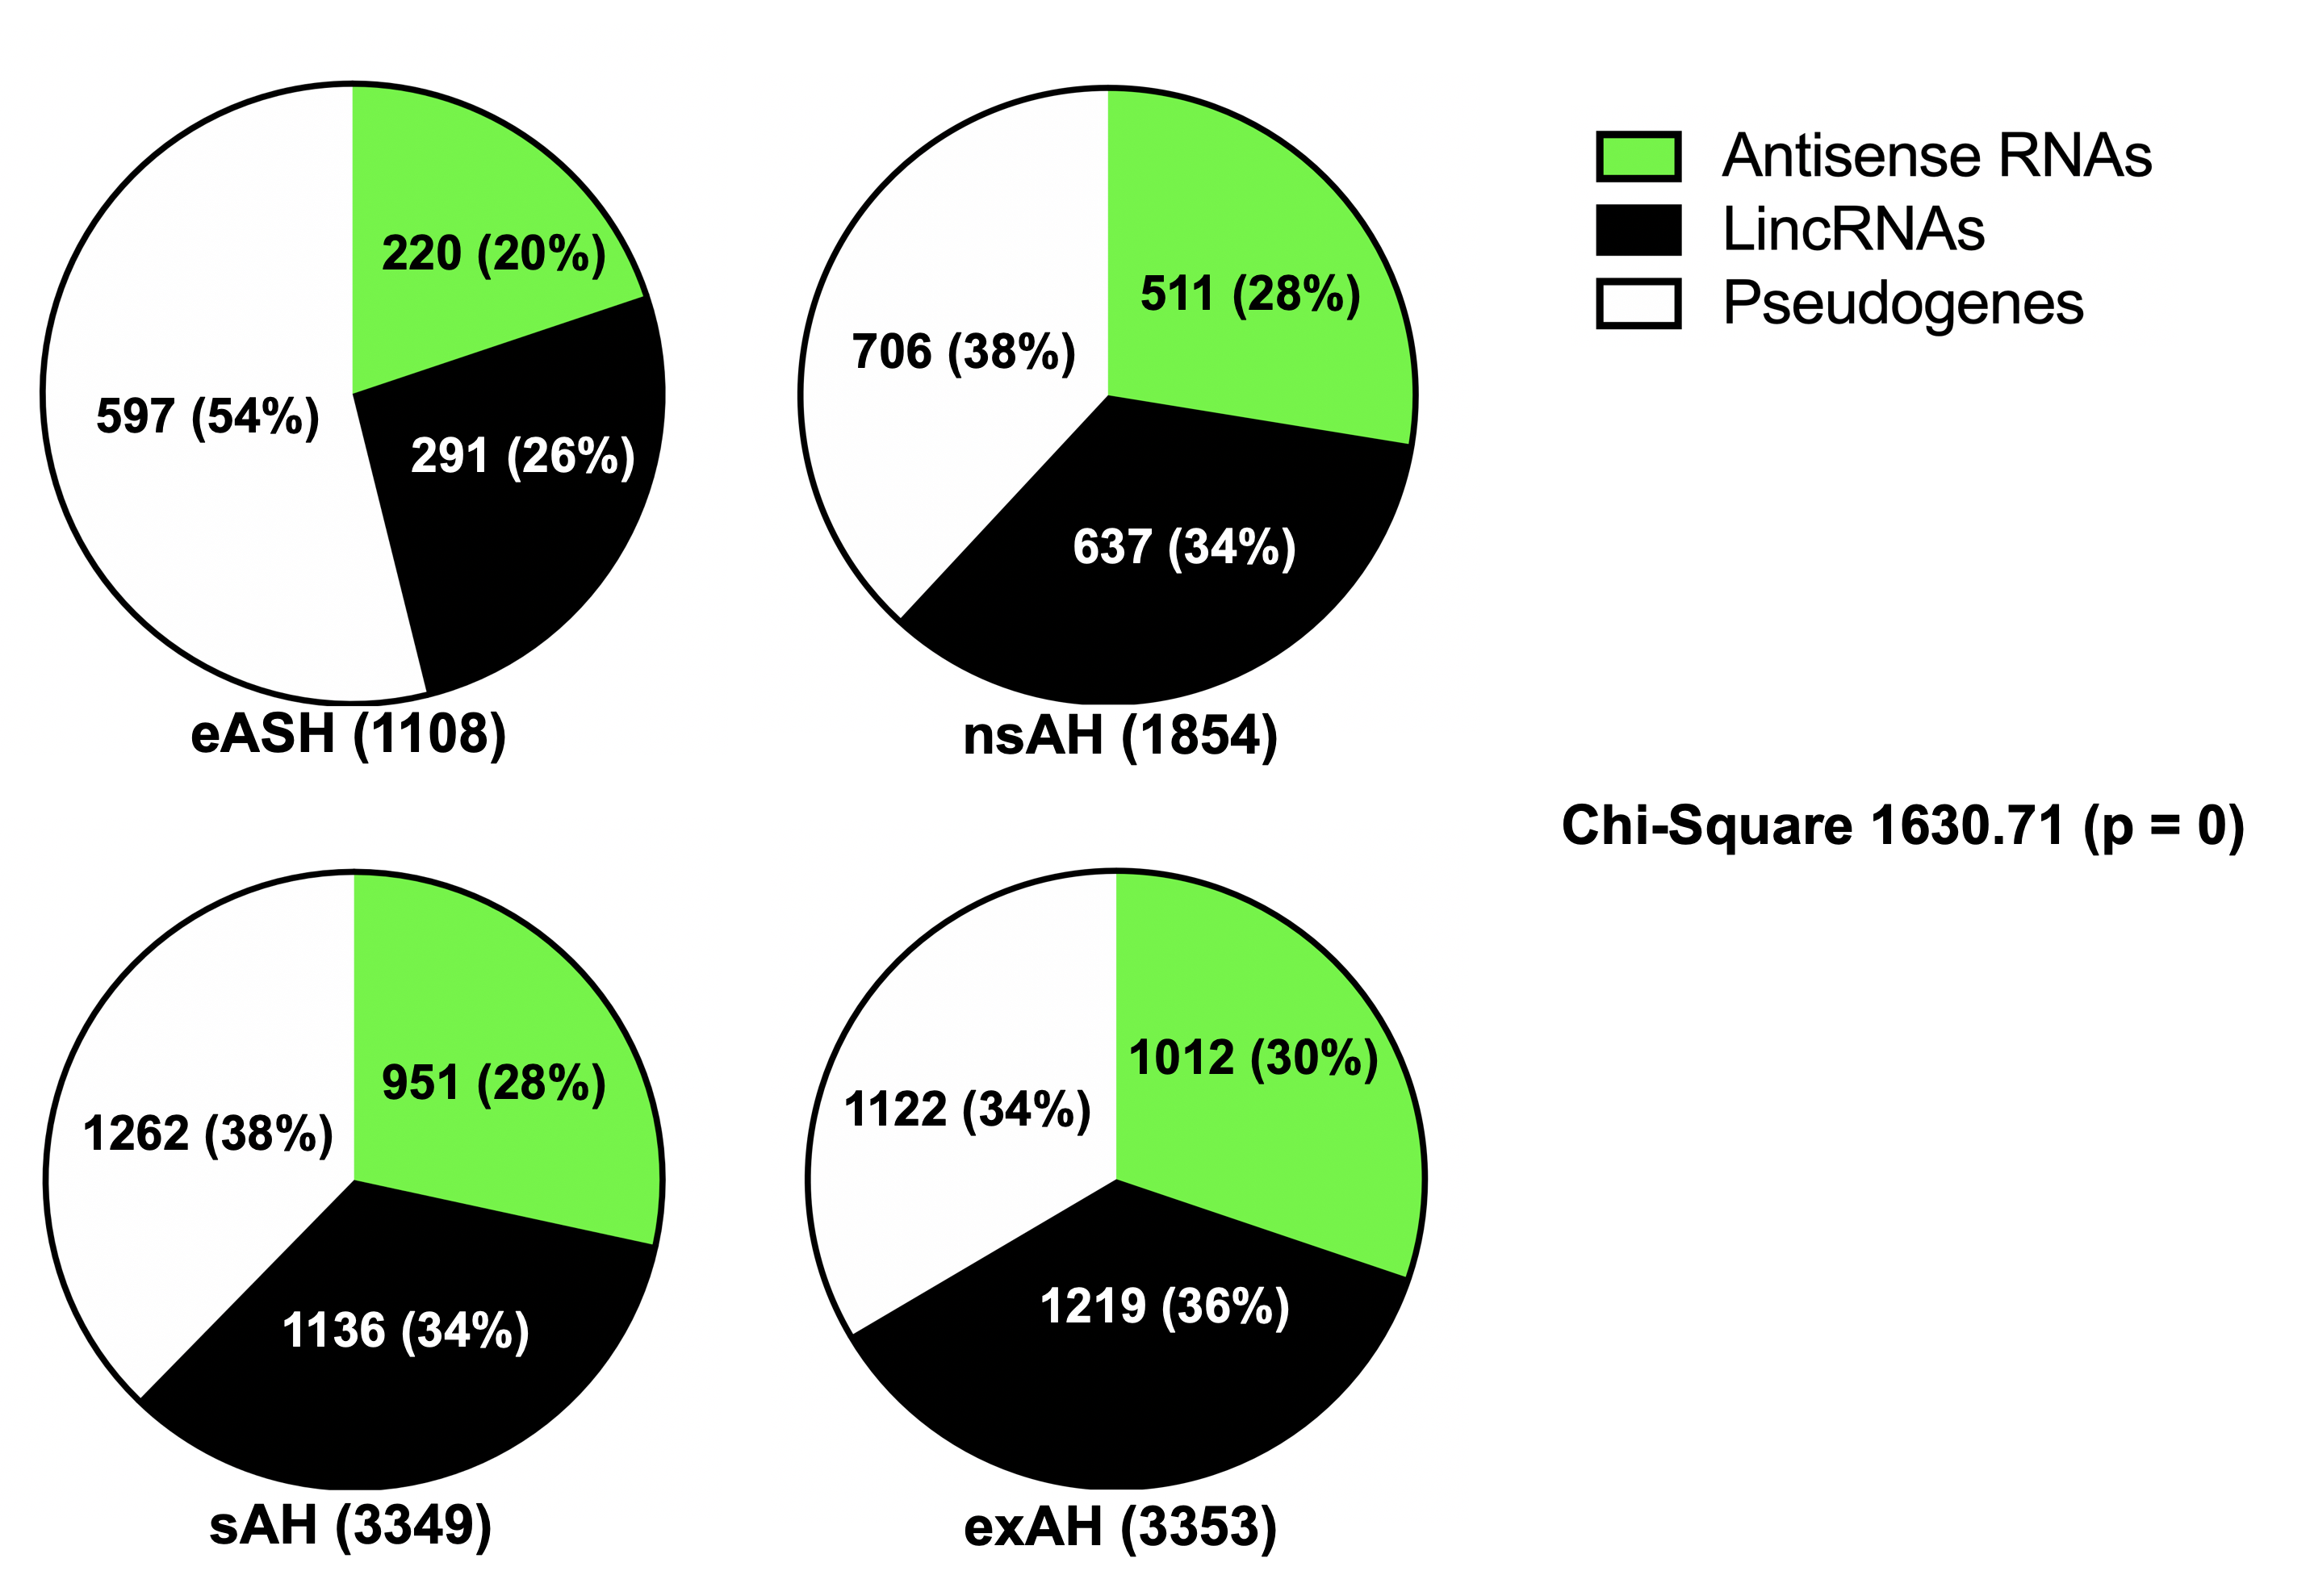
**

**Supplementary Figure 5.** Distribution of altered hepatic lncRNAomes in AUD. eASH – early alcoholic steatohepatitis, nsAH – non-severe alcoholic hepatitis, sAH – severe alcoholic hepatitis, exAH – explants from patients who underwent hepatic transplantation due to liver failure. LincRNAs – long intergenic non-coding RNAs. Difference in proportion of affected lncRNAs between groups was calculated using chi-square test.

**
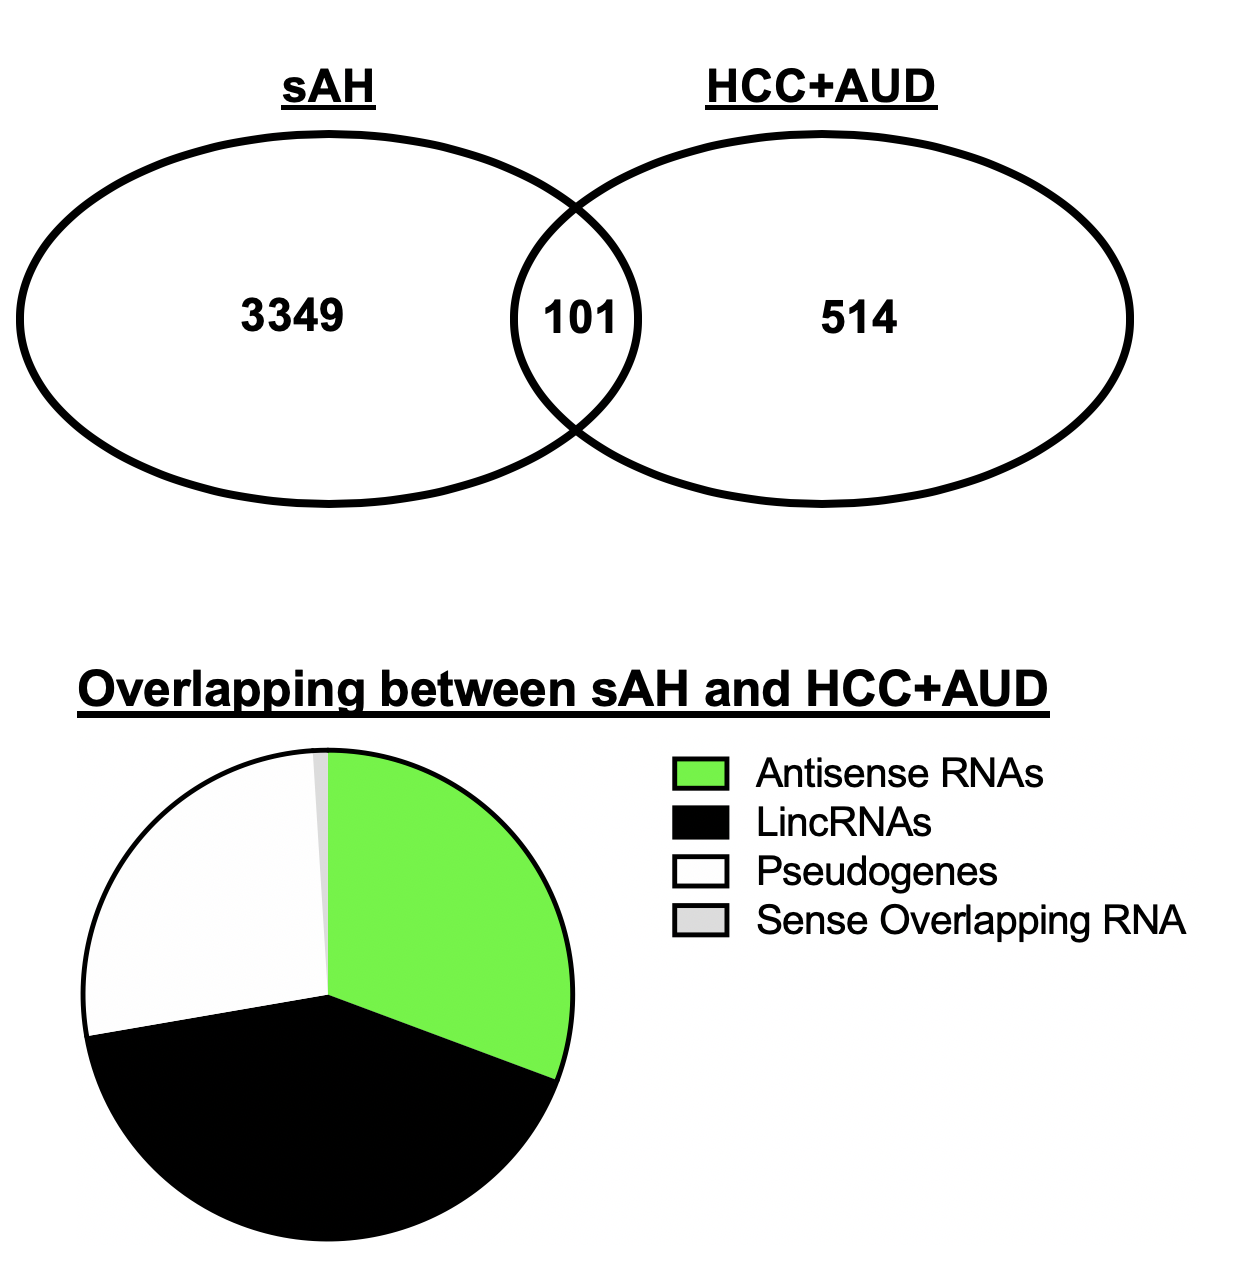
**

**Supplementary Figure 6.** LncRNAs overlapping in severe alcoholic hepatitis (sAH) and hepatocellular carcinoma in patients with alcohol use disorder (HCC+AUD). LincRNAs – long intergenic non-coding RNAs.

**
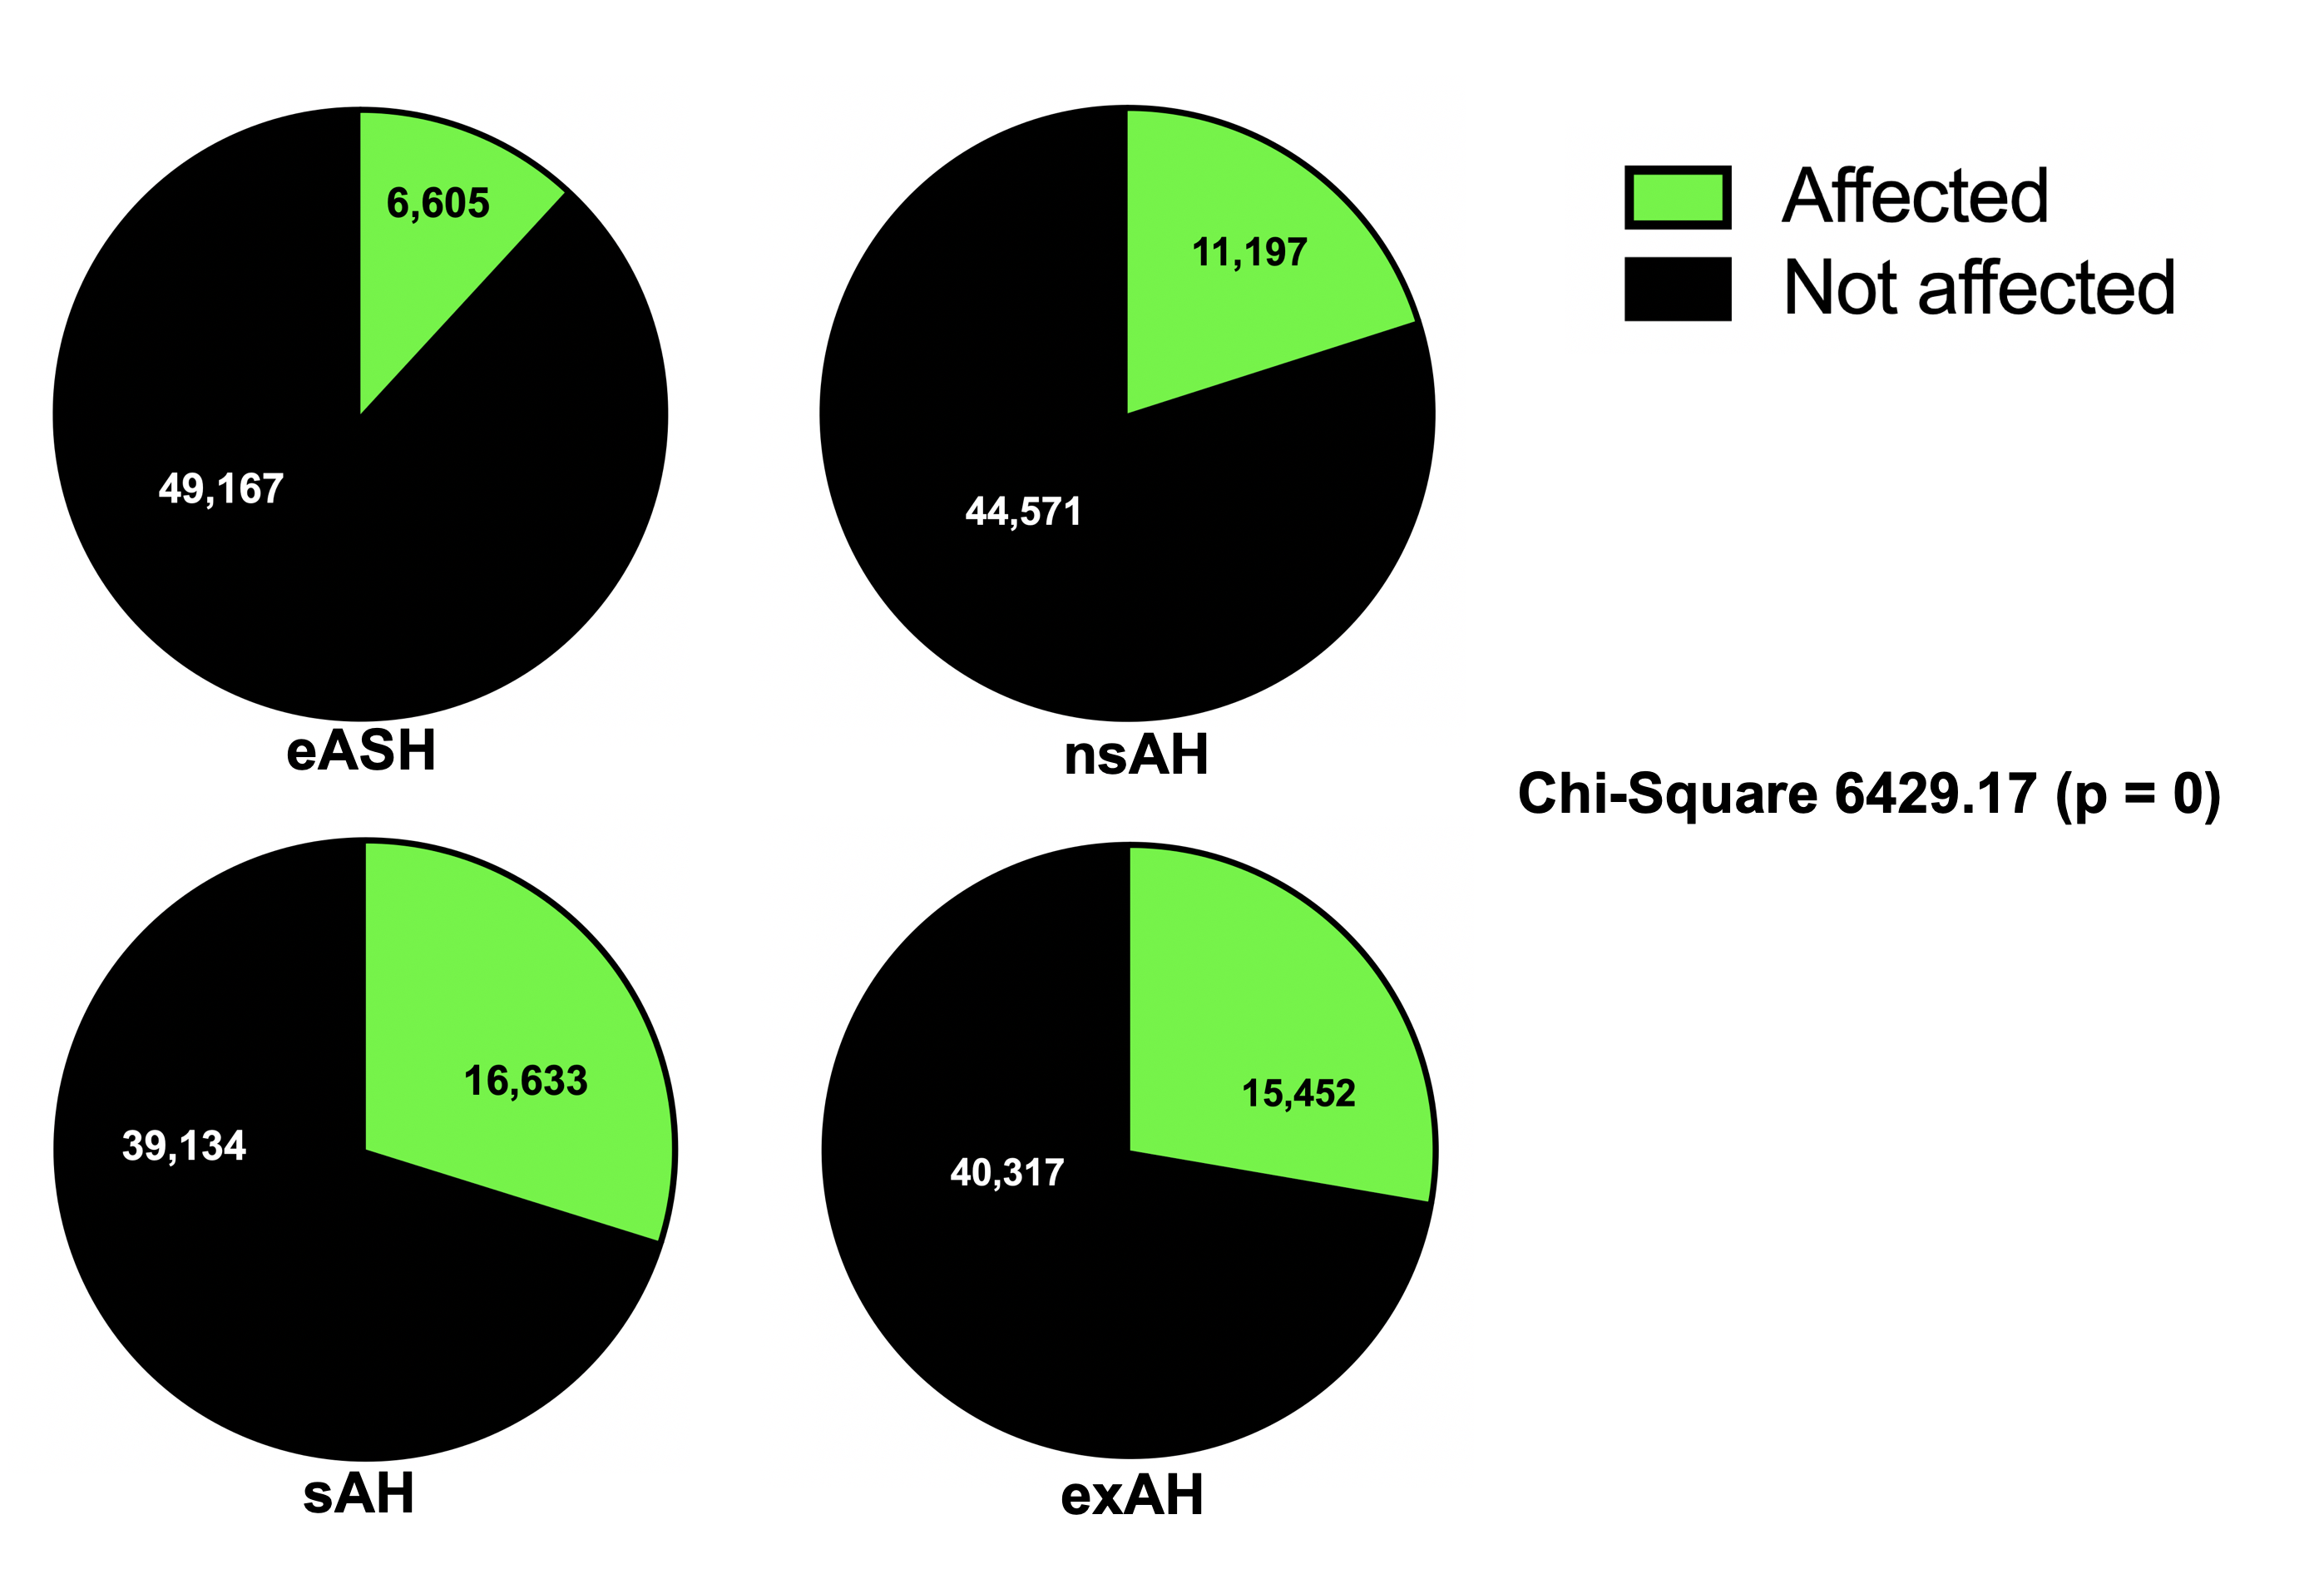
**

**Supplementary Figure 7.** Differentially expressed and misspliced genes in AUD. eASH – early alcoholic steatohepatitis, nsAH – non-severe alcoholic hepatitis, sAH – severe alcoholic hepatitis, exAH – explants from patients who underwent hepatic transplantation due to liver failure. Difference in proportion of affected genes between groups was calculated using chi-square test.


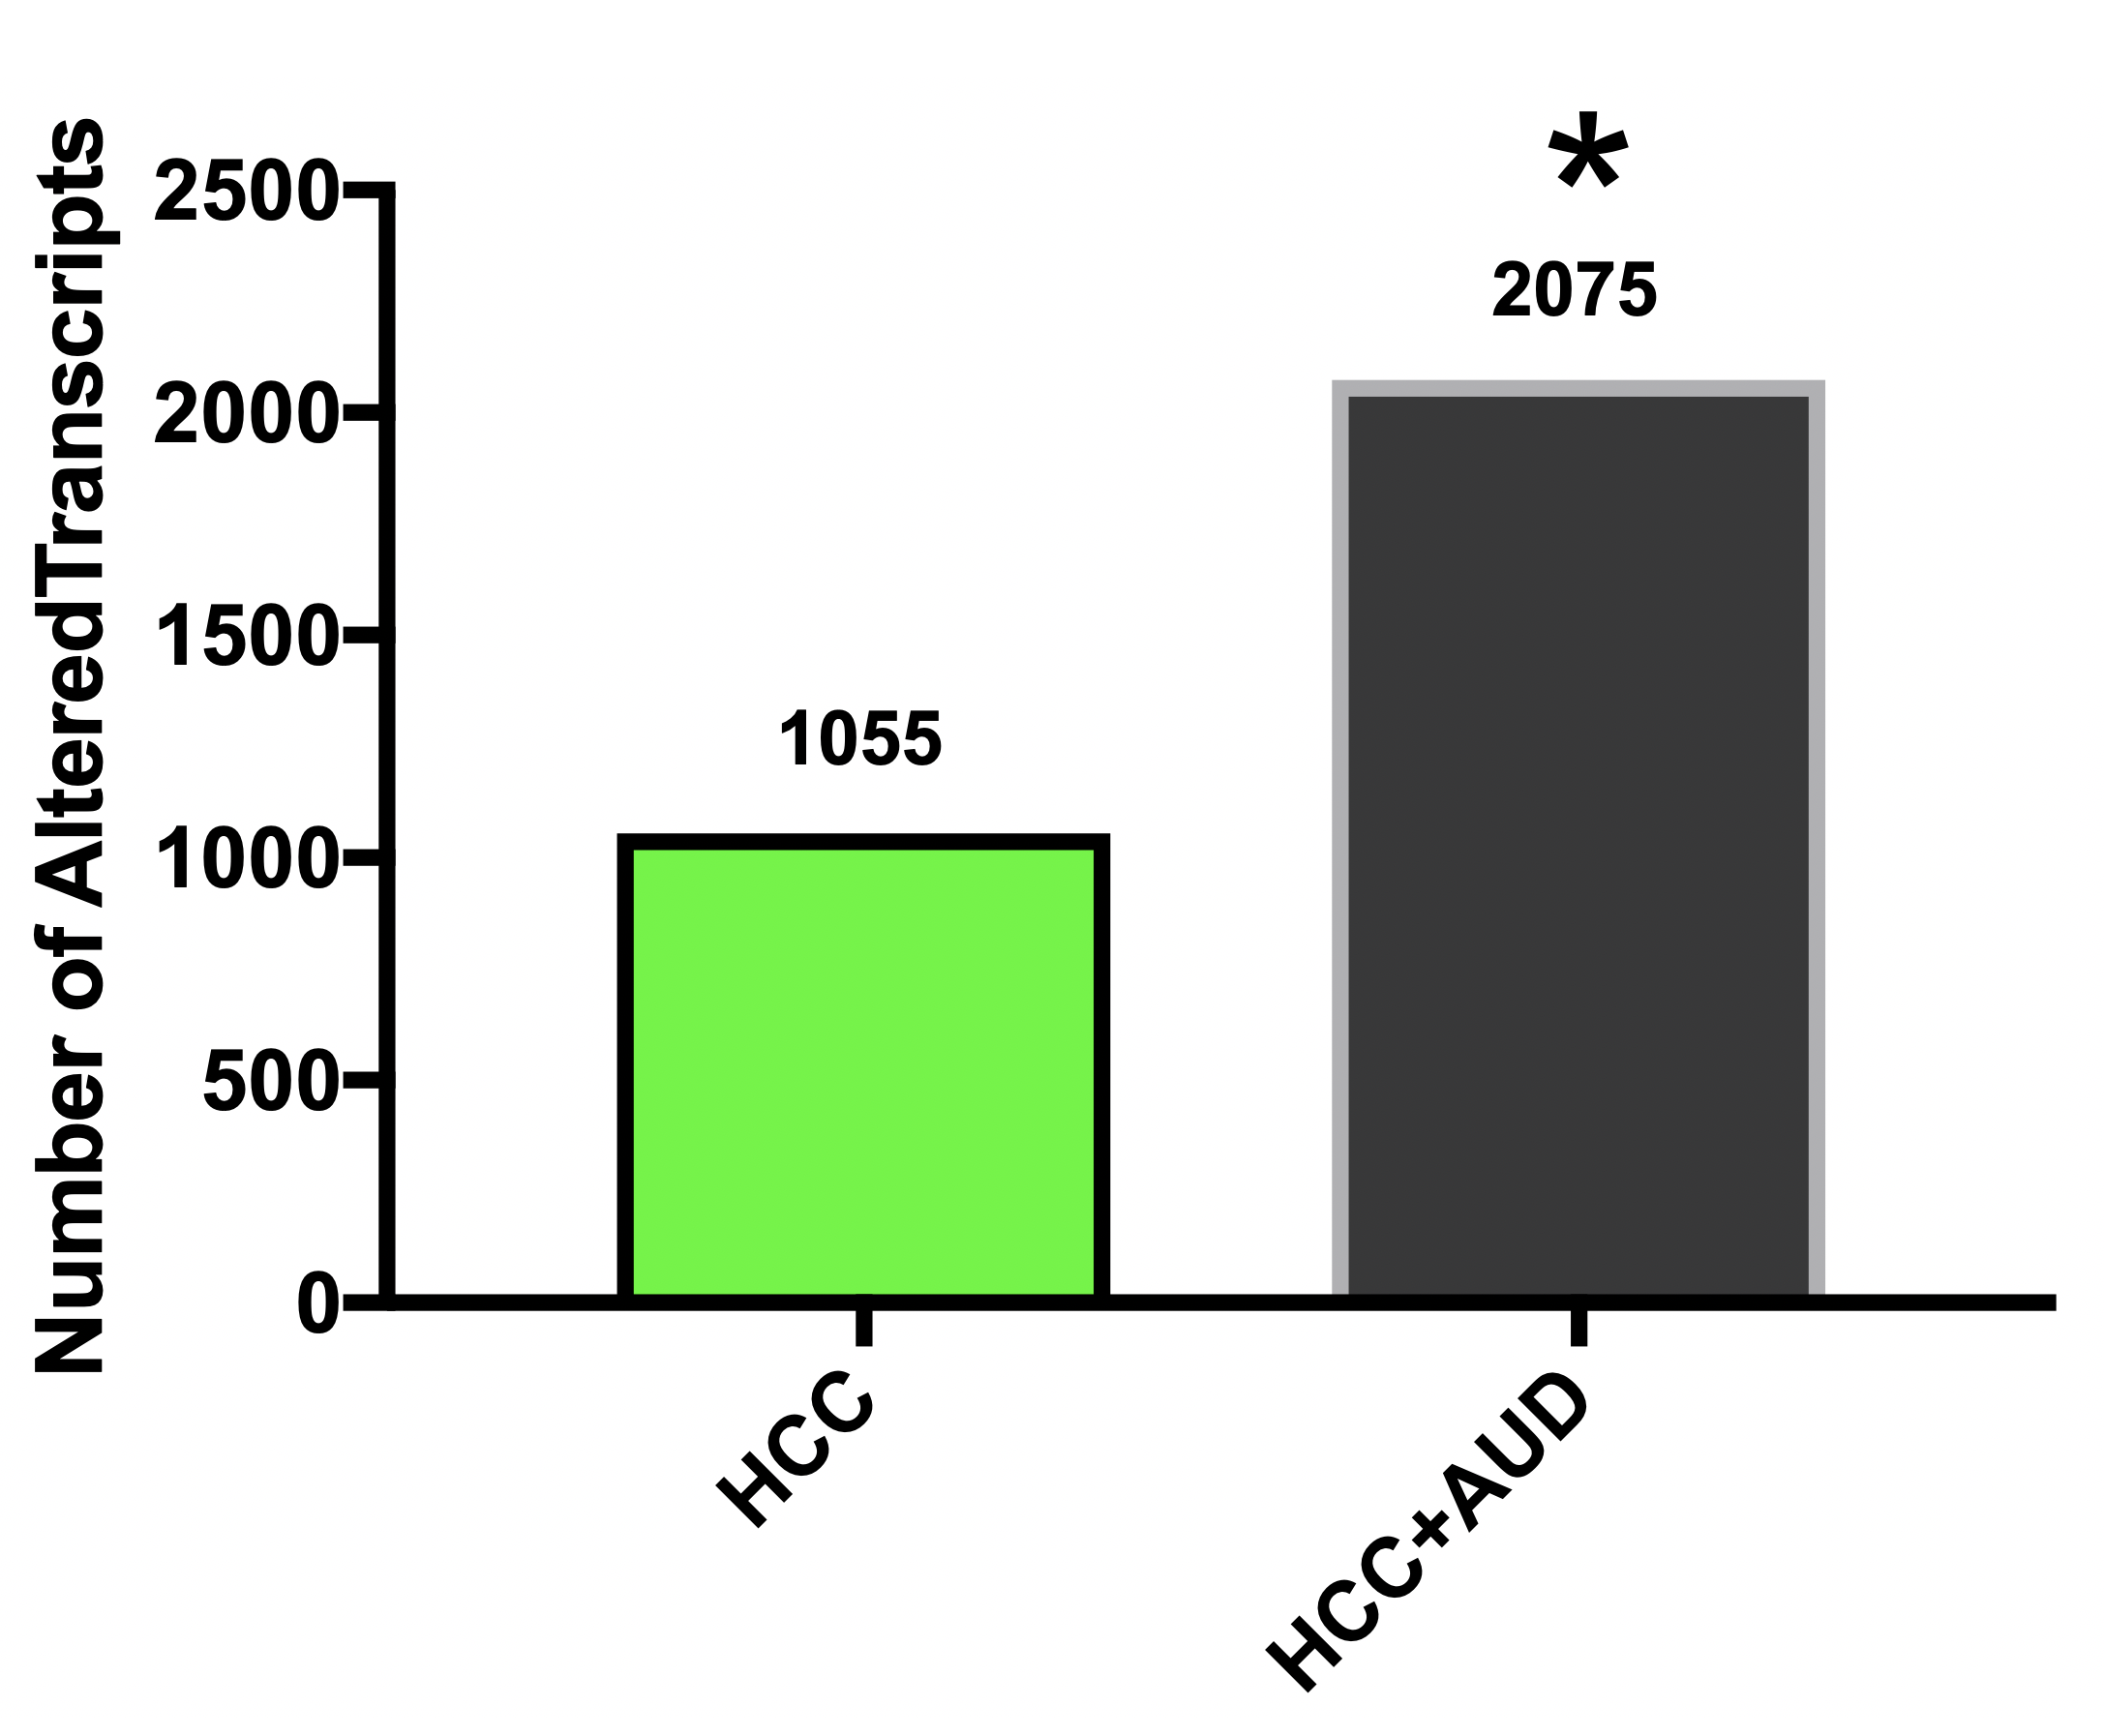


**Supplementary Figure 8.** Gene expression in hepatocellular carcinoma in patients with and without alcohol use disorder. HCC – hepatocellular carcinoma, AUD – alcohol use disorder. Difference in proportion of affected transcripts between groups was calculated using chi-square test.
