# Supplementary material for: Alcohol Use Disorder Causes Profound Global Changes in Gene Expression and Splicing in the Liver
Source: Research Square preprint supplement (doi:10.21203/rs.3.rs-6507570/v1), 2025-05-08
Supplement: Supplementary file 11 [file f99230adb73f17d68366a46d.xlsx]

## Sheet: Sheet1
Table 3
Transcript	eASH	nsAH	sAH	exAH
TP53		x	x	x
CTNNB1	x	x	x
ALB	x	x	x	x
AXIN1		x	x	x
BAP1	x		x
KEAP1
NFE2L2
LZTR1
RB1		x	x	x
PIK3CA
RPS6KA3		x	x	x
AZIN1			x	x
KRAS		x	x	x
IL6ST	x	x	x	x
RP1L1				x
CDKN2A		x	x	x
EEF1A1		x	x
ARID2
ARID1A	x	x	x	x
GPATCH4
ACVR2A
APOB	x	x	x	x
CREB3L3	x	x	x	x
NRAS			x
AHCTF1		x	x
HIST1H1C
	7	14	17	13
